1 **Extreme nuclear branching in healthy epidermal cells of the *Xenopus* tail**  
2 **fin**

3

4 **Running title: Extreme nuclear morphology**

5

6 Hannah E. Arbach<sup>1</sup>, Marcus Harland-Dunaway<sup>1</sup>, Jessica K. Chang<sup>2</sup>, and Andrea  
7 E. Wills<sup>1\*</sup>

8

9 1. Department of Biochemistry, University of Washington, Seattle, WA  
10 98195-3750

11 2. Department of Genetics, Stanford University, Stanford, CA 94305

12 \* To whom correspondence should be addressed [aewills@uw.edu](mailto:aewills@uw.edu)

13 **Key words:** Nuclear morphology, Nuclear envelope, Lamin, Actin, *Xenopus*  
14 *tropicalis*, epidermis

## 15 **Summary Statement**

16

17 Nuclei are highly branched throughout the heterogeneous population of healthy  
18 epidermal cells that comprise the *Xenopus* tail fin periphery, and disruption of  
19 nuclear branching mechanisms results in improper fin morphology.

20

## 21 **Abstract**

22

23 Changes in nuclear morphology contribute to regulation of complex cell  
24 properties, including differentiation and tissue elasticity. Perturbations of nuclear  
25 morphology are associated with pathologies that include, progeria, cancer, and  
26 muscular dystrophy. The mechanisms governing nuclear shape changes in  
27 healthy cells remain poorly understood, partially because there are few healthy  
28 models of nuclear shape variation. Here, we introduce nuclear branching in  
29 epidermal fin cells of *Xenopus tropicalis* as a model for extreme variation of  
30 nuclear morphology in a diverse population of healthy cells. We find that nuclear  
31 branching arises and elaborates during embryonic development. They contain  
32 broadly distributed marks of transcriptionally active chromatin and  
33 heterochromatin and have active cell cycles. We find that nuclear branches are  
34 disrupted by loss of filamentous actin and depend on epidermal expression of the  
35 nuclear lamina protein Lamin B1. Inhibition of nuclear branching disrupts fin  
36 morphology, suggesting that nuclear branching may be involved in fin  
37 development. This study introduces the nuclei of the fin as a powerful new model  
38 for extreme nuclear morphology in healthy cells to complement studies of nuclear  
39 shape variation in pathological contexts.

40

## 41 **List of abbreviations and symbols**

42 LINC- Linker of Nucleoskeleton and Cytoskeleton, HGPS – Hutchinson-Gilford  
43 Progeria Syndrome, TEM – Transmission electron microscopy, PH3 –  
44 Phosphorylated Histone 3, Lat B – Latrunculin B, WT- Wild type, Cyto D-  
45 Cytochalasin D, *Lmnb1* CRISPR – *lmb1* mutants generated by CRISPR/Cas9,

46 E- Lmnb1 CRISPR – epidermal specific *lmnb1* mutants generated by  
47 CRISPR/Cas9, Scrambl- tadpoles injected with a scrambled version of the *lmnb1*  
48 targeted sgRNA, Lmnb1-rod – dominant-negative Lamin B1 containing only the  
49 rod domain

50

## 51 **Introduction**

52

53 Nuclear shape is highly conserved across cell types and species. Most healthy  
54 cells have round or ellipsoid nuclei. A few healthy cell types exhibit non-ellipsoid  
55 morphologies, including neutrophils, which have a distinct lobular structure that  
56 allows them to extravasate to areas with damaged tissue (Pillay et al., 2013;  
57 Rowat et al., 2013). Frequently, perturbations in nuclear morphology are  
58 associated with disease. Well-studied examples include progeria (Chen et al.,  
59 2014; Dahl et al., 2006; Goldman et al., 2004; Schirmer et al., 2001; Verstraeten  
60 et al., 2008), muscular dystrophy (Bonne et al., 1999), neurodegeneration (Frost  
61 et al., 2016), and cancers (Denais and Lammerding, 2014; Fu et al., 2012; Shah  
62 et al., 2013). HeLa cells in particular are a model for nuclear morphological  
63 variation, which includes blebbing and ruffling of the nuclear membrane and  
64 dysregulation of multiple nucleoskeletal components (Wiggan et al., 2017).  
65 However, it is largely unclear what general mechanisms allow cells to acquire  
66 non-ellipsoid nuclear morphologies or how these morphologies could influence  
67 tissue and cellular function. One barrier to understanding extreme morphological  
68 variation of the nucleus is the dearth of models where nuclear morphology varies  
69 in the absence of disease. Here we characterize epidermal cells in the fin margin  
70 of *Xenopus tropicalis* tadpoles that have a non-ellipsoid, branched nuclear  
71 architecture. These striking nuclear morphologies arise during tail development  
72 and persist late into metamorphosis.

73

74 The nucleus derives its shape from interactions between the nucleoskeleton and  
75 the actin cytoskeleton. The nucleoskeleton is a complex network of Lamin  
76 filaments, associated proteins, and the LINC (**L**Inker of **N**ucleoskeleton and

77 Cytoskeleton) complex (Chang et al., 2015; Chen et al., 2014; Davidson and  
78 Lammerding, 2014; Denais and Lammerding, 2014; Fu et al., 2012; Goldman et  
79 al., 2004; Schirmer et al., 2001; Vergnes et al., 2004; Zwerger et al., 2013).  
80 Alterations in nuclear lamina composition, particularly the relative levels of A-type  
81 and B-type Lamins, enable changes in not only nuclear shape but also nuclear  
82 deformability (Swift et al., 2013). Changes in this ratio allow the formation of  
83 nuclear lobes and a highly deformable nuclear envelope in neutrophils, which in  
84 turn enable passage through small capillaries. Perturbation of B-type Lamins or  
85 their receptors has deleterious effect on neutrophil migration (Dreesen et al.,  
86 2013; Rowat et al., 2013). More recent studies of interactions between  
87 perinuclear actin and the nuclear envelope have also clarified that the rigidity of  
88 the actin cap and degree of actin polymerization directly affect nuclear shape and  
89 tissue stiffness (Swift et al., 2013; Wiggan et al., 2017). Variation in nuclear  
90 morphology is therefore predicted to have consequences for the biophysical  
91 function of the associated tissue, although relatively little is known about the  
92 mechanism by which other nuclear functions are modulated or constrained by  
93 extreme shape change (Dahl et al., 2006; Pajerowski et al., 2007; Rowat et al.,  
94 2013; Zwerger et al., 2013).

95  
96 The structural organization of the nuclear lamina scaffolds functional domains  
97 within chromatin and serves to protect the genome (Peric-Hupkes et al., 2010;  
98 Shah et al., 2013; Solovei et al., 2013). Chromatin-lamina interactions are  
99 important for appropriate gene regulation. Canonically, heterochromatin or  
100 repressed regions of the genome are associated with the nuclear lamina (Fraser  
101 et al., 2015; Mattout et al., 2015a; Peric-Hupkes et al., 2010). Alterations in  
102 heterochromatin propagation is linked to changes in nuclear morphology caused  
103 by laminopathies (Davidson and Lammerding, 2014; Dreesen et al., 2013;  
104 Perovanovic et al., 2016; Shah et al., 2013). Hutchinson-Gilford Progeria  
105 Syndrome (HGPS) is a laminopathy that causes premature aging and is  
106 associated with mutations in LMNA that disrupt prelamin A cleavage, leading to  
107 gross changes in nuclear morphology (Goldman *et al.*, 2004; Dahl *et al.*, 2006;

108 Verstraeten *et al.*, 2008; Chen *et al.*, 2014). As cultured cells with HGPS *lemma*  
109 mutations undergo more passages, they acquire progressively more nuclear  
110 ruffling and alterations of heterochromatin, resembling senescent cells rather  
111 than proliferative cells. Similar alterations in heterochromatic regions are seen in  
112 Lamin B1-depleted cells and cancer cells (Perovanovic *et al.*, 2016; Shah *et al.*,  
113 2013). This suggests that alteration of the nucleoskeleton can contribute to large-  
114 scale changes in chromatin reorganization and gene expression that contribute  
115 to aging or other pathologies.

116

117 In this study we have characterized nuclear branching in the fin epithelium of  
118 *Xenopus* tadpoles. The thin epithelium of the tadpole is made up of flattened  
119 epidermal cells that overlie a mesenchymal core (Tucker and Slack, 2004). Its  
120 specialized cell biological and biophysical properties allow rapid regeneration and  
121 sinusoidal swimming movements. We show that branched morphologies of the  
122 nuclear lumen, chromatin, and nuclear lamina arises during development in a  
123 heterogenous population of epidermal cells that make up the fin periphery. Cells  
124 with branched nuclei contain epigenetic marks of active enhancers and inactive  
125 chromatin throughout the nucleoplasm, additionally these cells have active cell  
126 cycles. We find that actin filaments, but not polymerized microtubules are  
127 necessary to maintain branched nuclear morphology. We also find that functional  
128 epidermal Lamin B1 is required for both nuclear branching and for proper  
129 development of the fin and tail.

130

## 131 **Results**

132

### 133 **Nuclei in the tail of *Xenopus tropicalis* are branched**

134

135 Although *Xenopus* has long served as a model for epidermal cell biology and  
136 nuclear composition, there has been little examination of nuclear morphology in  
137 the differentiated fin. We conducted whole-embryo DAPI stains of the *Xenopus*  
138 *tropicalis* tadpole fin, which revealed an unexpected elaborately branched

139 distribution of DNA in the fin marginal cells (Fig. 1A). Although examples of  
140 potentially branched nuclear morphologies can be observed in earlier literature,  
141 these have not been described in detail (Davis and Kirschner, 2000). Our first  
142 goal was to establish whether branching was confined to chromatin or was  
143 shared by the nuclear lumen and envelope (Fig. 1B). To this end, cleavage-stage  
144 embryos were injected with either a cocktail of *h2b-rfp* and *lmnb3-gfp* mRNA to  
145 label histones (chromatin) and the nuclear lamina respectively, or with GFP  
146 bearing a nuclear localization signal (Nuclear GFP) (Fig. 1C). Tadpoles were  
147 reared to NF stage 41 and then live images were taken in the anterior-most third  
148 of the fin margin. Nuclear GFP confirmed that the nuclear lumen in cells of the fin  
149 margin is also highly branched structure (Fig. 1D). Consistent with our  
150 observations for DAPI, we find that H2B-RFP has a branched distribution in the  
151 nuclei of fin margin cells. Lamin B3-GFP localization showed that the nuclear  
152 compartment is also branched (Fig. 1D). Thus, the entire nucleus of fin marginal  
153 cells is branched, including the lamina, lumen, and chromatin.

154

155 We next asked what the spatiotemporal distribution of nuclear branching is  
156 during *Xenopus* development. Because injected mRNAs have a limited lifetime,  
157 we utilized immunohistochemistry to explore endogenous nuclear structure in the  
158 epidermis and other tissues through development. Tadpoles were fixed at  
159 various stages and stained for Lamin B1 to show the nuclear periphery and,  
160 DAPI to label chromatin. We find that by late neurula stages (NF stage 18), the  
161 nuclear envelope is ruffled and irregular, though the chromatin distribution is still  
162 largely ellipsoid (Fig. 1E). We note that ruffling of the nuclear envelope is found in  
163 several epidermal cell types at this stage, including secretory cells, multiciliated  
164 cells, and the goblet cells surrounding them (Fig. S1). At NF stage 22, ruffling of  
165 the nuclear envelope is more pronounced, though chromatin distribution as  
166 shown by DAPI remains ellipsoid. As the embryo enters tailbud stages, the  
167 distribution of both chromatin and the nuclear lamina becomes gradually more  
168 branched, with defined branches appearing by NF stage 26, multiple branches  
169 evident per nucleus by NF stage 35, and the most elaborate degree of branching

170 reached by NF stage 41 (Fig. 1E). The absolute number of branches per nucleus  
171 is quite variable, ranging dramatically from 2-13 (Fig. S1). All nuclear branching  
172 is lost shortly before the onset of tail reabsorption, and epidermal cells of the  
173 adult frog are not branched (data not shown). While non-ellipsoid nuclear  
174 structures are also visible in some other cell types, notably  
175 granulocytes/neutrophils, nuclear branching was only observed in epidermal  
176 cells. Epidermal cells of the head at stage 41 showed some minor lobulation,  
177 while nuclei of other tissues such as the heart and somites were ellipsoid (Fig.  
178 S1). The only structure in which we identified branched nuclei in outside of the  
179 tail was the surface epithelial cells covering the retina (Fig. S1).

180

181 **Branched nuclei have intact envelopes, and contain normal mitochondria,**  
182 **nucleoli, and marks of active enhancers**

183

184 Because perturbations of nuclear morphology are associated with pathology in  
185 many cell types (Li et al., 2016; Wang et al., 2008), we asked whether epidermal  
186 cells with branched nuclei showed hallmarks of cellular damage or senescence.  
187 These could include nuclear envelope rupture, mitochondrial damage, or cell  
188 cycle exit. To assess subcellular signs of cell damage, we utilized TEM  
189 (Transmission electron microscopy) to assess nuclear envelope integrity and  
190 mitochondrial abundance. Micrographs reveal diverse nuclear structures (Fig.  
191 2A), including clearly demarcated branched nuclei enclosed by bilayer nuclear  
192 envelopes. Upon close examination of the nuclear envelope we see that it is a  
193 continuous bilayer in cells with branched nuclei, with an average of 18 nm  
194 between the inner and outer leaflets and containing nuclear pores with a mean  
195 diameter of 60 nm (Fig. 2B). The integrity of the nuclear envelope is also  
196 supported by the even distribution of Nuclear GFP within the nuclear lumen and  
197 by the continuous distribution of LaminB1 in branched nuclei, with no evidence of  
198 leaks, partitions or ruptures (Fig. 1D, E). Cells with branched nuclei also contain  
199 numerous mitochondria with abundant cristae (Fig. 2A). These observations  
200 suggest cells with branched nuclei are not undergoing apoptotic or senescent



201 processes that would be reflected in nuclear envelope breakdown, low  
202 mitochondrial numbers or loss of mitochondrial cristae.  
203  
204 TEM did reveal some atypical features in branched nuclei, including a lack of  
205 well-defined regions of perinuclear increased electron density in micrographs that  
206 would be indicative of heterochromatic regions, or of clear identifiable nucleoli  
207 (Fig. 2A). To determine if there were nucleoli present in nuclear branches we  
208 analyzed localization of the nucleolar marker fibrillarin (Brangwynne et al., 2011).  
209 We found that cells with branched nuclei did contain foci of fibrillarin (Fig. 2C),  
210 suggesting the presence of nucleoli, and that the average number of foci per  
211 nucleus did not change between branched (1.60) and unbranched nuclei (1.69)  
212 (Fig. 2D). We did note that foci of fibrillarin did not correspond to apparent foci of  
213 H2B.

214  
215 To better understand whether cells with branched nuclei contain both active and  
216 inactive chromatin domains, we used immunofluorescence and live imaging to  
217 examine the distribution of histone modifications associated with active  
218 enhancers (H3K27ac and H3K4me1), and heterochromatin (H3K9me3 and  
219 HP1 $\beta$ ). Using immunofluorescence we find H3K27ac, H3K4me1, and H3K9me3  
220 are all distributed broadly in branched nuclei at NF stage 41 (Fig. 2E); the  
221 distribution appears uniform for H3K27ac, but H3K9me3 appeared more  
222 concentrated in foci, and H3K4me1 may be excluded from some regions of the  
223 nuclear periphery. To better characterize the distribution of heterochromatin, we  
224 used a GFP fusion of the heterochromatin binding protein HP1 $\beta$  (Mattout et al.,  
225 2015b). We find that HP1 $\beta$ -GFP broadly co-localizes with H2B (Fig. 2F).  
226 Although heterochromatin is typically enriched at the nuclear envelope, we did  
227 not observe a clear enrichment of HP1 $\beta$  at the nuclear periphery, however, we  
228 observe foci of HP1 $\beta$ -GFP fluorescence in the nucleus corresponding to foci in  
229 H2B. Taken together this suggests that active enhancers and heterochromatin  
230 are found throughout nuclear branches.

231



## 232 **Cells with branched nuclei have active cell cycles**

233

234 In many cell types, breakdown of ellipsoid nuclear morphology is a hallmark of  
235 senescence, cell cycle dysregulation, or genomic instability (Dahl et al., 2006;  
236 Goldman et al., 2004; Schirmer et al., 2001; Wang et al., 2008) In particular,  
237 keratinocytes are known to acquire aberrant nuclear morphologies following  
238 terminal differentiation and cell cycle exit, and in premature aging syndromes  
239 (Gdula et al., 2013; McKenna et al., 2014). We therefore wanted to determine if  
240 cells with branched nuclei in the keratin-rich tadpole epidermis were undergoing  
241 an active cell cycle. We utilized immunofluorescence of Phosphorylated-Histone  
242 H3 (PH3) to mark mitotic nuclei, and Lamin B1 to mark the nuclear periphery. We  
243 find numerous examples of PH3-positive cells that retain branched nuclei (Fig.  
244 3A). Examination of chromatin morphology in PH3-positive cells suggests that  
245 nuclei remain branched and are still enclosed by a branched nuclear envelope  
246 through prophase but form a condensed metaphase plate while the nuclear  
247 envelope breaks down. Chromatin remains condensed through anaphase.  
248 Daughter cells establish independent branching patterns and re-form the nuclear  
249 envelope at late telophase.

250

251 To better characterize nuclear envelope and chromatin dynamics through  
252 mitosis, we conducted live imaging using H2B-RFP and membrane-GFP to track  
253 individual nuclei throughout mitosis (Fig. 3B, Movie 1). These confirmed our initial  
254 observations that nuclei are initially branched, formed morphologically normal  
255 metaphase plates that segregate into two well-defined populations at anaphase,  
256 and are re-enclosed by the nuclear envelope following telophase, with the  
257 nucleus beginning to re-form branches approximately 21 minutes after  
258 cytokinesis (Movie 1). Nuclear branching patterns in daughter cells do not  
259 typically recapitulate those of the mother cell, nor do both daughters show the  
260 same branching patterns. Additionally, branches did not appear to be reabsorbed  
261 once formed after the completion of mitosis but did exhibit some dynamic motion  
262 within the branches. In nuclei not undergoing mitosis, the number and relative

263 positions of branches can remain stable for two hours or more. Both fixed and  
264 live imaging therefore demonstrate that branched nuclei are able to undergo  
265 mitosis.

266

### 267 **Perturbations of Actin and not Microtubules disrupt nuclear branching**

268

269 We next sought to determine what molecular mechanisms enabled nuclear  
270 branching in the fin margin. In mammalian cells, perturbations of nucleoskeleton  
271 components lead to nuclear shape deformation. These include mutations in  
272 LMNA, which lead to nuclear blebbing in progeroid syndromes (Chen et al.,  
273 2014; Dahl et al., 2006; Goldman et al., 2004; Perovanovic et al., 2016;  
274 Verstraeten et al., 2008), mutations or duplications of LMNB1 or its receptor,  
275 which disrupt nuclear flexibility and extravasation in neutrophils (Dreesen et al.,  
276 2013) perturbations of the Sun and Nesprin components of the LINC complex  
277 (Chang et al., 2015; Hatch and Hetzer, 2016; Kim and Wirtz, 2015), or alterations  
278 in the abundance, orientation, or phosphorylation of actin, which contribute to  
279 nuclear morphological disruption in HeLa cells (Ho et al., 2013; Kim and Wirtz,  
280 2015; King and Lusk, 2016; Ramdas and Shivashankar, 2015; Webster et al.,  
281 2009; Wiggan et al., 2017; Zwerger et al., 2013). Therefore, we decided to  
282 pursue whether similar components were required for nuclear branching in the fin  
283 margin.

284

285 First, we observed actin localization in cells with branched nuclei. We found no  
286 apparent bias of actin localization to tips or bases of branches (Fig. 4A). To  
287 determine if actin filaments were necessary for nuclear branches we incubated  
288 stage 41 tadpoles with Latrunculin B (Lat B), which disrupts actin filament  
289 formation which Lat B has been found to disrupt other actin-dependent  
290 processes in *Xenopus* at these non-lethal doses (Lee and Harland, 2007). To  
291 monitor the effect of this inhibitor on actin filaments and nuclear morphology, we  
292 injected embryos at cleavage stages with mRNAs encoding H2B-RFP and the  
293 actin binding protein Utrophin-GFP. We find that treatment with Lat B results in

294 breakdown of the actin cytoskeleton beginning at 25 minutes post treatment. At  
295 this time, foci of Utrophin-GFP were visible (Movie 2, Fig. 4B). Nuclear branches  
296 were gradually lost after actin destabilization and were lost more slowly in nuclei  
297 that initially had more numerous or complex branches. Nuclear branches  
298 reformed after wash-out of Lat B. Actin filaments visualized by LifeAct began to  
299 be visible 25 minutes after Lat B removal along with some nuclear deformation,  
300 similar kinetics to what was observed for the loss of actin filaments. By 125  
301 minutes after Lat B removal new branches were fully formed although the  
302 branching patterns were not conserved relative to their initial pre-treatment  
303 distribution (Fig. 4C).

304  
305 Because actin has known roles in compressing nuclei (Versaevel et al., 2012;  
306 Vishavkarma et al., 2014; Wiggan et al., 2017) and nuclear branches are in an  
307 extremely flattened epithelium, we next measured changes in nuclear depth and  
308 surface area -to- volume ratios of nuclei with intact and Lat B perturbed actin  
309 networks. Both WT (wild type) and Lat B-treated tadpoles had comparable  
310 nuclear depths (5.6 and 4.1  $\mu\text{m}$  respectively) (Fig. 4D). However, the nuclear  
311 surface area -to- volume ratio decreased from 1.405 in WT to 1.134 in Lat B  
312 treated animals (Fig. 4E). Nuclear volume also decreased by approximately 7.5%  
313 and the surface decreased by approximately 25.4% in Lat B treated animals  
314 (Data not shown). Together this suggests that loss of branches decreases the  
315 amount of nuclear membrane (surface area) relative to the volume. However, the  
316 lack of change in nuclear depth suggests that actin is not supplying a compressive  
317 force causing branches to form, but rather pushing, or pulling forces.

318  
319 To confirm that loss of nuclear branches was not specific to Lat B treatment we  
320 utilized Cytochalasin D (Cyto D), which inhibits actin polymerization and has also  
321 been shown to disrupt other actin-dependent processes in *Xenopus* (Lee and  
322 Harland, 2007). Treatment with either Cyto D or Lat B results in a rapid loss of  
323 nuclear branching in the fin margin, as revealed by LamnB3-GFP and H2B-RFP

324 (Fig. 4F).

325

326 We next asked whether microtubules contributed to nuclear branches, as they  
327 have been shown to play a role in maintaining nuclear morphology (Tariq et al.,  
328 2017). We utilized the microtubule polymerization inhibitor nocodazole at non-  
329 lethal doses (Dutta and Kumar Sinha, 2015). While nocodazole treatment  
330 noticeably disrupts spindle formation in tadpoles, it does not affect nuclear  
331 morphology relative to DMSO-treated controls (Fig. 4G).

332

333 We quantified changes in nuclear morphology for all cytoskeleton perturbations  
334 using the circularity measurement on ImageJ (see methods, Fig. S2). We found  
335 there was a statistically significant increase in epidermal nuclear circularity when  
336 tadpoles were treated with either Cyto D or Lat B, but not Nocodazole (Fig. 4H).  
337 These results indicate that nuclear branches require intact actin filaments for  
338 their maintenance, but not polymerized microtubules.

339

#### 340 **LaminB1 is necessary for nuclear branches**

341

342 We next asked whether nuclear branching relies on specific components of the  
343 nuclear lamina. Modulation of nuclear lamina components has been shown to  
344 regulate tissue elasticity in mammals: greater amounts of Lamin A contribute to  
345 stiffer tissue, while Lamin B is critical for nuclear envelope flexibility in neutrophils  
346 (Mattout et al., 2015a; Mattout et al., 2015b; Peric-Hupkes et al., 2010;  
347 Perovanovic et al., 2016; Solovei et al., 2013; Towbin et al., 2012). *Xenopus*  
348 *tropicalis* contain one Lamin A/C homolog, as well as three Lamin B homologs:  
349 Lamin B1, Lamin B2 and the germline-specific Lamin B3 (Session et al., 2016).  
350 We first sought to determine whether any of these components were  
351 preferentially enriched or depleted in fin marginal cells containing branched  
352 nuclei. To this end, we isolated fin margin tissue or whole embryo tissue, and  
353 quantified expression of *Imnb1*, *Imnb2*, and *Imna* using qRT-PCR (Fig. S2). We  
354 find that expression of *Imnb1* is significantly upregulated in the fin margin relative

355 to the whole embryo (2.6-fold increase), whereas *lmnb2* and *lmna* are  
356 unchanged. To determine whether this upregulation reflected a functional role for  
357 *lmnb1* in the fin margin or in nuclear branching, we used CRISPR/Cas9 to create  
358 mutations in *lmnb1* by co-injecting gene-specific sgRNAs together with  
359 humanized Cas9 protein in F0 tadpoles (Bhattacharya et al., 2015; Nakayama et  
360 al., 2013). To track nuclear and cell morphology, we again co-injected these  
361 embryos with mRNAs encoding H2B-RFP and Membrane-GFP. We used high-  
362 resolution melt analysis to confirm gene-specific mutations (Fig. S2). Upon  
363 analyzing nuclear morphology in F0 tadpoles at stage 41, we find that only *lmnb1*  
364 mutant embryos (*Lmnb1* CRISPR) have markedly reduced branching, instead  
365 exhibiting crescent or elongated obloid shapes (Fig. 5A). This effect is confined  
366 to *lmnb1* mutants and is not induced by injection of a scrambled version of the  
367 *lmnb1* sgRNA (Scrambl) (Fig. 5A).

368

369 To confirm that these effects were intrinsic to epidermal cells, and not secondary  
370 to any effect of whole-embryo perturbation, we next targeted our injections  
371 specifically to the ventral animal blastomeres at the 8-cell stage, which give rise  
372 to the epidermal lineage (Bauer et al., 1994; Moody, 1987). These epidermal-  
373 only *lmnb1* mutant embryos (E- *Lmnb1* CRISPR) also exhibited reduced nuclear  
374 branching in the fin epidermis (Fig. 5A). As a further confirmation, we generated  
375 a *Xenopus* form of dominant-negative Lamin B1, following the domain structure  
376 used in mammals (Goldman et al., 2004). This dominant negative LaminB1  
377 (*Lmnb1-rod*) contains only the rod domain, which is thought to disrupt the lamin  
378 network and LINC complex interactions when overexpressed (Goldman et al.,  
379 2004). We co-injected this into epidermal blastomeres at the 8-cell stage,  
380 together with H2B-RFP and Membrane-GFP. Epidermal cells injected with  
381 *Lmnb1-rod* also exhibited reduced nuclear branching at stage 41 (Fig. 5A). We  
382 quantified nuclear circularity in *Lmnb1* perturbed tadpoles and found that  
383 epidermal cells in *Lmnb1* CRISPR, E-*Lmnb1* CRISPR, and *Lmnb1-rod* tadpoles  
384 had statistically significant increase in nuclear circularity, where there was no

385 difference between WT and *Scrmbl* tadpoles (Fig. 5B). Together these results  
386 argue that nuclear branching depends on functional Lamin B1 in the epidermis.

387

388 **Nuclear morphology arises independently from swimming motions and**  
389 **contributes to fin morphology**

390

391 One potential source of nuclear morphological variation derives from the physical  
392 forces exerted against the nucleus either by intracellular compression, such as  
393 through perinuclear actin, or by extracellular compression, such as that exerted  
394 by endothelial cells during neutrophil extravasation. The tadpole fin encounters a  
395 unique extracellular force profile as it undergoes swimming movements. We  
396 therefore tested if the mechanical forces sustained by the fin from swimming  
397 were required for nuclear branching in the fin. To this end, we utilized dorsal  
398 posterior explants at the neurula stage. These explants give rise to tails with fins  
399 that lack muscle (Tucker and Slack, 2004). We then compared the circularity of  
400 nuclei in the fin margin of stage matched tadpoles and nuclei in the fin of  
401 explants and found no change in circularity (Fig. 6A). This suggests that the  
402 mechanical forces from swimming are not necessary to induce nuclear  
403 branching.

404

405 We concluded by investigating the relationship between nuclear branching and  
406 development. We observed that tadpoles with *Imnb1* mutations had tail defects,  
407 sloughing of the fin epidermis, were inefficient swimmers, and developed edema,  
408 likely due to decreased locomotion (Fig. 6B, C). We found that nuclear  
409 morphology and fin morphology were correlated; in *imnb1* sgRNA-injected  
410 tadpoles that had no tail defect, we did not observe changes in nuclear  
411 morphology (Fig. S2). Tails were statically significantly shorter and narrower in  
412 tadpoles with *Imnb1* mutations compared to wild type (Fig. 6D, E). This suggests  
413 that *Imnb1*-dependent nuclear branching may be necessary for proper tail  
414 formation and function but does not rule out the possibility that the contribution of  
415 the function of LaminB1 on gene regulation affects tail formation.

416

417

## 418 **Discussion**

419

### 420 ***Xenopus* epidermal branching as a model for extreme variation in healthy** 421 **nuclear morphology**

422

423 Across tissues and species, nuclear morphology is generally ellipsoid. There are  
424 very few cases of healthy epithelial cell types with highly irregular nuclear  
425 morphologies; the mandibular gland epithelium of the wax moth *Ephesia*  
426 *kuehniella* is a notable example, which exhibits a branched nuclear  
427 morphology similar to the morphology of the tadpole fin (Buntrock et al., 2012).  
428 Here we describe an epithelial epidermal tissue, the *Xenopus* tadpole fin margin,  
429 which exhibits a highly branched nuclear morphology. In this epithelial tissue, a  
430 heterogenous population of cell types including secretory cells, goblet cells and  
431 multiciliated cells displays highly irregular branched nuclear morphology. The  
432 degree of nuclear branching we describe is more extreme than in most other  
433 instances of nuclear morphological changes among both healthy and diseased  
434 vertebrate cells. Like neutrophils, these fin margin cells develop branched  
435 nuclear morphology over the course of development, but unlike neutrophils  
436 appear to decrease branching to some degree as tadpoles age.

437

438 *Xenopus* has long served as a model organism for nuclear morphology, including  
439 molecular and cell biological characterization of nuclear envelope components  
440 and the cell biological consequences of their perturbation. Overexpression of  
441 specific Lamin components has been observed to alter both nuclear shape and  
442 size in oocyte nuclei from *Xenopus laevis*, and nuclear size scaling in early  
443 *Xenopus* embryos is dependent on cytoplasmic volume as well as the nuclear  
444 transport factors Importin a and NTF2 (Good et al., 2013; Jevtić and Levy, 2015;  
445 Jevtić et al., 2015; Levy and Heald, 2010). More recently, *Xenopus* has served  
446 as a source model for proteomic studies of nuclear composition (Wühr et al.,



447 2015). Morphological variation in nuclei later in embryogenesis has not been  
448 examined in depth. We find that nuclear branching begins late in neurulation, well  
449 after the initial specification of epidermal fate but similar to the stage when  
450 multiciliated cells begin to undergo apical emergence (Sedzinski et al., 2016).  
451 Nuclear branching is dramatically elaborated as the tail elongates, and by late  
452 tailbud stages highly branched nuclei are found both in multiciliated cells and  
453 their goblet cell neighbors. Our data suggest that nuclear branching is a general  
454 property of the fin margin epithelium in *Xenopus*. The extremity of morphological  
455 variation observed suggests that these nuclei may represent a valuable model for  
456 nuclear diversity: they are easily imaged, in a whole organism system that is  
457 easily modulated both genetically and through small molecules.

458

#### 459 **Branched nuclei do not interfere with cell health or mitosis**

460

461 *Xenopus* epidermal fin cells exhibit branched nuclear morphologies while  
462 maintaining an active cell cycle. This is in contrast to many cases of non-ellipsoid  
463 nuclear morphologies, which occur in post mitotic-cells. In the epidermis,  
464 keratinocytes are known to undergo nuclear flattening and to acquire  
465 irregularities in their nuclear envelope after cell cycle exit, and these become  
466 more extreme with aging or in specific disease scenarios (Yang et al., 2011).  
467 Among actively-cycling cells, nuclear morphological perturbations such as  
468 blebbing or nuclear ruffling are common in cancer cells but very infrequent in  
469 healthy cell types (Denais and Lammerding, 2014; Fu et al., 2012; Pillay et al.,  
470 2013; Shah et al., 2013). We find that nuclear branching is common in mitotic  
471 epidermal cells in the *Xenopus* tail fin, with rapid collapse of nuclear branching  
472 approximately 7 minutes before metaphase and re-formation of nuclear branches  
473 becoming apparent 21 minutes after cytokinesis (Movie 1). Branched nuclei do  
474 appear to undergo complete nuclear envelope breakdown, and we have not  
475 found evidence of karyomeres or chromosome-specific nuclear envelopes as are  
476 seen in the early mitoses of zebrafish and *Xenopus* (Lemaitre et al., 1998; Schoft  
477 et al., 2003). Following mitosis, the branched structure formed by the two

478 daughter cells are distinct and do not faithfully recapitulate the mother cell's  
479 nuclear morphology.

480

481 In cells with branched nuclei we find that both active enhancers and  
482 heterochromatin are distributed continuously throughout the nucleus. Normally,  
483 regions of chromatin that are transcriptionally repressed are associated with the  
484 nuclear lamina and the periphery of the nucleolus (Mattout et al., 2015a; Mattout  
485 et al., 2015b; Peric-Hupkes et al., 2010; Perovanovic et al., 2016; Solovei et al.,  
486 2013; Towbin et al., 2012). In TEM of branched epidermal nuclei we see no  
487 increase in electron density around the nuclear periphery, nor do we find  
488 evidence of increased electron density representing a nucleolus in most nuclei.  
489 However, we found that cells with branched nuclei did contain foci of fibrillarin, a  
490 component of the nucleolus, in regions distinct from the densest chromatin as  
491 represented by H2B fluorescence. Interestingly we do see puncta of increased  
492 intensity of HP1 $\beta$  and H3K9Me3 but have not yet seen corresponding regions of  
493 increased density on TEM. Taken together this suggests that cells with branched  
494 nuclei may partition heterochromatin without anchoring these regions to the  
495 nuclear lamina. Future research will examine the organization of heterochromatin  
496 in branched nuclei, and the organization of specific chromatin domains within  
497 these nuclei.

498

#### 499 **Nuclear branching in tail fin is dependent on nucleoskeleton components**

500

501 Previous work has shown a role for the nuclear lamina, LINC complex, and  
502 cytoplasmic actin in the shaping of the nucleus (Chen et al., 2014; Hatch and  
503 Hetzer, 2016; Hatch et al., 2013; Ho et al., 2013; Kim and Wirtz, 2015; King and  
504 Lusk, 2016; Lammerding et al., 2006; Ramdas and Shivashankar, 2015; Webster  
505 et al., 2009; Wiggan et al., 2017). Here we have shown that both an intact actin  
506 network and Lamin B1 are necessary to maintain nuclear branches. Our working  
507 model therefore suggests that actin and LaminB1 filaments serve to maintain  
508 nuclear branches by stabilizing curvature across the nuclear envelope. Loss of

509 either filamentous actin or LaminB1 results in a broken bridge across the nuclear  
510 envelope disrupting local curvature without envelope blebbing (Fig. 6F).  
511 Additional experiments will be needed to clarify how the loss of Lamin B1 may  
512 indirectly affect the localization of other Lamin sub-types or binding partners  
513 affect nuclear branching.

514

515 Actin is known to play a role in compressing the nucleus with stress fibers during  
516 migration or passage through narrow openings (Versaevel et al., 2012;  
517 Vishavkarma et al., 2014; Wiggan et al., 2017). In laminopathies nuclei lose  
518 rounded morphologies and adopt more irregular architectures. Previous studies  
519 have also shown that gaps in the nuclear lamina allow blebbing (Hatch et al.,  
520 2013). Conversely, the fin margin nuclei appear to have a fully functional lamina  
521 network with no apparent gaps. There was no obvious localization of actin to the  
522 base or tips of nuclear branches indicative of actin pushing or pulling on the  
523 nucleus, but, loss of actin caused nuclei to increase in circularity, suggesting that  
524 by some other mechanism they contribute to nuclear branching. We also found  
525 that the loss of actin did not increase nuclear depth suggesting that the extra-  
526 cellular matrix or other force transmitting molecules cause the flattening of this  
527 tissue. We did find that there was a decrease in nuclear surface area to volume  
528 ratio when f-actin was lost, as well as a modest decrease in total nuclear volume.  
529 These observations both suggest that nuclear envelope distribution, and possibly  
530 quantity, are closely linked to f-actin in these nuclei. While it is clear f-actin is  
531 necessary to maintain nuclear branches, it is unclear how nuclear actin or actin  
532 binding proteins contribute to maintenance, and establishment of nuclear  
533 branches. Previous studies have shown a relationship between cell-spreading  
534 and nuclear actin polymerization raising the possibility that in this flattened  
535 epithelium nuclear actin may contribute to nuclear branch formation (Keeling et  
536 al., 2017; Plessner et al., 2015). Another possibility that we have not yet been  
537 able to test explicitly is the role for intra-nuclear actin filaments (Baarlink et al.,  
538 2017; Kalendová et al., 2014; Oda et al., 2017), which may also contribute to  
539 nuclear branching. Out time-lapse movies show that nuclear morphological

540 change tracks closely in time with cytoplasmic f-actin disruption. We therefore  
541 favor the hypothesis that cytoplasmic f-actin is critical to nuclear morphology, but  
542 intranuclear actin may also contribute to the formation or stabilization of  
543 branches.

544

#### 545 **A potential biological function for nuclear branching**

546

547 Perturbations of nuclear branching have deleterious effects on the formation of  
548 the fin and consequently on its downstream function. While we have been able to  
549 show that specific nucleoskeletal components are required for nuclear branching,  
550 the ultimate role of branched nuclear morphologies in tail fin cell and tissue  
551 function remains open. Nuclear branching may play a role in genomic  
552 organization or gene regulation, as discussed above, or in fin biomechanics.

553

554 The thin epithelium of the tadpole fin is made up of flattened epidermal cells that  
555 overlie a mesenchymal core. Its specialized cell biological and biophysical  
556 properties allow rapid regeneration and sinusoidal swimming movements (Tucker  
557 and Slack, 2004). To accommodate this structure, a flattened nuclear structure  
558 would be advantageous, and nuclear branching could impart biophysical  
559 properties necessary for tissue function. The elastic modulus of the nucleus has  
560 been shown to be different than that of the cytoskeleton. The irregular nuclear  
561 structure could aid in creating a more uniform elastic modulus of the tissue, as  
562 opposed to localized regions of differential stiffness (Guilak et al., 2000; Kha et  
563 al., 2004; Pajerowski et al., 2007). The requirement of Lamin B1 to maintain  
564 nuclear branches suggests that nuclear branching could be modulating tissue  
565 stiffness (Kha et al., 2004; King and Lusk, 2016; Pajerowski et al., 2007; Swift et  
566 al., 2013; Verstraeten et al., 2008; Zwerger et al., 2013).

567

568 In conclusion, we have shown that the fin epithelium of the *Xenopus tropicalis*  
569 tadpole tail contains a heterogenous population of cells that have branched  
570 nuclear structures. These cells with branched nuclei are healthy and have active

571 cell cycles. Additionally, we have shown that nuclear branching depends on an  
572 intact actin network and Lamin B1. We determined that forces incurred from  
573 swimming are not necessary to induce nuclear branches, however, loss of  
574 nuclear branching through *Imnb1* mutations decreases swimming efficiency and  
575 impede tail and fin development. These cells offer a novel system to study  
576 extreme nuclear morphological variation in a healthy tissue.

577 **Materials and Methods**

578

579 **Ovulation, in vitro fertilization, and rearing of embryos**

580

581 Use of *Xenopus tropicalis* was carried out under the approval and oversight of  
582 the IACUC committee at UW, an AALAC-accredited institution. Ovulation of adult  
583 *X. tropicalis* and generation of embryos by in vitro fertilization according to  
584 published methods (Khokha et al., 2002; Sive et al., 2010). Fertilized eggs were  
585 de-jellied in 3% cysteine in 1/9x modified frog ringer's solution (MR) for 10-15  
586 minutes. Embryos were reared as described (Khokha et al., 2002). Staging was  
587 assessed by Nieuwkoop and Faber (Nieuwkoop and Faber, 1994).

588

589 **mRNA synthesis and injections**

590

591 DNA plasmids were linearized at appropriate restriction sites (Table 1) and  
592 mRNA was transcribed with Sp6 mMessage mMachine kits (Ambion). mRNAs  
593 were injected into embryos at the 1-8 cell stage, depending on experiment, with  
594 doses indicated in Table 1.

595

596 Table 1.

| RNA                                           | Vector | Linearization | Dose (pg/embryo) |
|-----------------------------------------------|--------|---------------|------------------|
| Nuclear-GFP*                                  | pCS2+  | NotI          | 100              |
| H2B-RFP*                                      | pCS2+  | NotI          | 100              |
| Membrane-RFP*                                 | pCS2+  | NotI          | 100              |
| Utrophin-GFP**                                | pCS2+  | NotI          | 100              |
| LifeAct-GFP**                                 | pCS2+  | NotI          | 100              |
| LmnB3- GFP***                                 | pCS2+  | NotI          | 150              |
| Lmnb1 Rod only                                | pCS107 | KpnI          | 100              |
| GFP-HP1 $\beta$<br>(Mattout et al.,<br>2015b) | pBCHGN | KpnI          | 150              |
| Fibrillarin -GFP****                          | pCS107 | KpnI          | 100              |

597 \*Generous gifts from Richard Harland, University of California Berkeley

598 \*\* Generous gift from John Wallingford, University of Texas Austin

599 \*\*\*Generous gift from Daniel Levy, University of Wyoming

600 \*\*\*\*Generous gift from Clifford Brangwynne, Princeton University

601

602

### 603 **Immunohistochemistry**

604

605 *X. tropicalis* embryos were fixed for 20 minutes in MEMFA at room temperature.  
606 Embryos were permeabilized by washing 3X 20 minutes in PBS + 0.01% Triton  
607 x-100 (PBT). Embryos were blocked for 1 hour at room temperature in 10% CAS-  
608 block (Invitrogen #00-8120) in PBT. Then embryos were incubated in primary  
609 antibodies (see table below) in 100% CAS-block overnight at 4°C. Embryos were  
610 then washed 3X 10 minutes at room temperature in PBT and re-blocked for 30  
611 minutes in 10% CAS-block in PBT. Secondary antibodies (see table below) were  
612 diluted in 100% CAS-block and incubated for 2 hours. Embryos were then  
613 washed 3X 20 minutes in PBT. Whole embryos or isolated tails were mounted on  
614 slides in Vectashield containing DAPI (Vector Laboratories #H-1500). Images  
615 were acquired with a Lecia DM 5500 B and ORCA-flash 4.0LT camera.

616

| <b>Antibody</b>    | <b>Dilution</b> | <b>Catalogue Number</b>  |
|--------------------|-----------------|--------------------------|
| LaminB1            | 1:1000          | Abcam 16048              |
| Phospho-H3         | 1:1000          | Abcam 14955              |
| H3K27ac            | 1:500           | Abcam 4729               |
| $\beta$ -tubulin   | 1:500           | Sigma T8535              |
| $\alpha$ - tubulin | 1:250           | Invitrogen 62204         |
| H3K27Me3           | 1:500           | Abcam 6002-100           |
| H3K4Me             | 1:500           | Abcam 8895               |
| H3K9Me3            | 1:500           | Active Motif 39162       |
| Anti- mouse        | 1:500           | Life Technologies A21422 |
| Anti-rabbit        | 1:500           | Life Technologies A11008 |

617



618 **Quantification of the number of nuclear branches**

619

620 Branches were counted as the number of termini of the nucleus (Fig. S1),  
621 Branches were counted from images of tadpoles with nuclear markers of H2B,  
622 DAPI, or Nuclear localized GFP.

623

624 **Live imaging conditions**

625

626 Tadpoles were imaged sedated in 0.01% tricaine in 1/9<sup>th</sup> MR. Tadpoles were  
627 mounted for imaging as previously described (Kieserman et al., 2010;  
628 Wallingford, 2010) with the following modifications for Actin and Lamin B1  
629 perturbation (Fig. 4,5): A perimeter of vacuum grease was made on a glass slide.  
630 A tadpole was placed in the center of the vacuum grease perimeter with several  
631 drops of media containing drug. A glass cover slip was gently pressed into the  
632 vacuum grease perimeter over the tadpole. Images were acquired with a Lecia  
633 DM 5500 B. Mitosis and Actin perturbation movies were acquired with a Zeiss  
634 880. Gross tadpole morphologies were acquired with a Lecia M205 FA.

635

636 **Transmission electron microscopy**

637

638 Stage 41 tadpoles were fixed in 2.5% glutaraldehyde/0.1M sodium cacodylate  
639 buffer. Samples were washed 4 times in sodium cacodylate buffer, postfixed in  
640 osmium ferrocyanide (2% osmium tetroxide/3% potassium ferrocyanide in buffer)  
641 for 1 h on ice, washed, incubated in 1% thiocarbohydrazide for 20 min, and  
642 washed again. Samples were washed and *en bloc* stained with 1% aqueous  
643 uranyl acetate overnight at 4°C. Samples were finally washed and *en*  
644 *bloc* stained with Walton's lead aspartate for 30 min at 60°C, dehydrated in a  
645 graded ethanol series, and embedded in Durcupan resin. Serial sections were  
646 cut at 60 nm thickness and viewed on a JEOL-1230 microscope with an AMT  
647 XR80 camera (Giarmarco et al., 2017).

648

649 **qPCR**

650

651 Total RNA was isolated from embryos (3-5 per experiment) or fin margin (15-20  
652 per experiment) (Sive et al., 2010). RNA was treated with DNase 1 (Invitrogen  
653 #18068015). cDNA was synthesized using SuperScript III first strand synthesis  
654 kit (Intivrogen #18080-051). Quantitative PCR analysis was preformed using  
655 BioRad iCycler PCR machine, iQ Sybr Green mix (BioRad #1708862) and  
656 analysis software.

657

| Target                               | Forward Primer       | Reverse Primer       |
|--------------------------------------|----------------------|----------------------|
| <i>Imnb1</i>                         | AACCAGAACTCATGGGCAAC | ACTGTTGTGCGCTGTGCTAC |
| <i>Imnb2</i>                         | ACAGGCATTGGATGAACTCC | TCAAGCTTGGCCTGATAGGT |
| <i>Odc</i> (ornithine decarboxylase) | TTTGGTGCCACCCTTAAAC  | CCCATGTCAAAGACACATCG |
| <i>Imna</i>                          | ACTGTACCGATTCCCACAGC | GAGGAGCTGAGCTGGACAGT |

658

659

660 **Nuclear circularity quantification**

661

662 A gaussian blur was applied to all images in a data set and a threshold was  
663 applied to images. Particles were selected using FIJI (ImageJ) and manually  
664 refined. Particles were discarded if the whole nucleus was not in the field of view,  
665 if a partial particle was selected based on the original image, if a particle selected  
666 was comprised of two nuclei in the original image, or if a particle selected did not  
667 appear on the original image. After manual refinement circularity of particles were  
668 measured using FIJI (ImageJ) (Schöchlin et al., 2014).

669

670 **Pharmacological Inhibitors**

671

672 Latrunculin B (Sigma, L5288) and Cytochalasin D (Sigma, C8273), Nocodazole  
673 (CalBiochem, 31430-18-9) were resuspended using DMSO as a vehicle.

674 Latrunculin B and Cytochalasin D were equilibrated at room temperature for 1

675 hour prior to use. For experiments inhibitors were diluted to the following final  
676 concentrations in 1/9 MR: 1 $\mu$ M Latrunculin B, 10 $\mu$ M cytochalasin D (Lee and  
677 Harland, 2007), 150  $\mu$ M Nocodazole.

678

### 679 **Surface area and volume measurements**

680

681 IMARIS was utilized to create the 3D renderings and perform the surface area  
682 and volume calculations, with a surface area detail level for all treatments of 0.25  
683  $\mu$ m. Nuclei were excluded if volumes were below 100  $\mu$ m<sup>3</sup> or above 1000  $\mu$ m<sup>3</sup>, as  
684 these were determined to be incomplete nuclei or fused nuclei respectively when  
685 images were examined.

686

### 687 **CRISPR guide design and injection**

688

689 CRISPR guides were designed from the V7.1 or V8 gene models on Xenbase  
690 and CRISPRscan. Target sites were chosen from UCSC tracks. Guides were  
691 chosen using the following criteria: no off targets predicted, a score greater than  
692 50, and in a region in or as close to exon 1 as possible. We generated site  
693 specific sg-RNA by ordering a single oligo 5' -

694 CTAGCTAATACGACTCACTATAGG-(n18) target sequence

695 GTTAGGAGCTAGAAATAG-3' (Table below). PCR was performed as described  
696 in Bhattacharya et al. (Bhattacharya et al., 2015). SgRNA was transcribed using  
697 T7 mMachine kit (Ambion). Guides were injected into 1 or 2 cell embryos (dose  
698 in table below) with 1.5ng Cas9 (Bhattacharya et al., 2015; Nakayama et al.,  
699 2013).

700

| Guide name | Target Sequence    | Dose           |
|------------|--------------------|----------------|
| Lmnb1 G1   | GGGAAGAGGTGCGGAGCC | 400 pg/ embryo |
| Lmnb1 G2   | GCGGAGCCGGAAGTGAG  | 400 pg/ embryo |
| Scrmbl     | GGGAAGAGGGCGTGAGCC | 400 pg/ embryo |

701

## 702 **Dominant negative LmnB1**

703

704 Lamin B1 dominant negative constructs were constructed following a similar  
705 strategy to Schirmer et al. (Schirmer et al., 2001), beginning with *X. laevis* Lamin  
706 B1 (Xenbase ORFeome clone XICD00712670) with the following primers: Rod  
707 only left primer: GGATCCATGGCCACTGCCACA and right primer:  
708 GAATTCCAGTGGCAGAGG.

709

## 710 **High-resolution melt analysis**

711

712 To extract genomic DNA individual tadpoles were lysed by heating at 95°C in  
713 25mM NaOH and 0.2mM EDTA. Samples were cooled to RT and equal volume  
714 of TRIS-HCl 40 mM buffer was added. 2µL of extracted genomic DNA was  
715 utilized in PCR reactions containing HRM master mix (GoTaq Flexi buffer  
716 (Promega #M8901), dNTPs, MgCl<sub>2</sub>, DMSO, EvaGreen (Biotium #31000), taq  
717 polymerase (Quiagen #201203), nuclease free water). The region of interest was  
718 amplified (Left primer GATCTGCAGGAGCTGAATGAC, right primer  
719 TGTTCACGGAGATCTTACTGA) for 35 cycles and melted from 60 - 95°C at  
720 0.1°C increments with EvaGreen fluorescence measured after each temperature  
721 change.

722

## 723 **Explants**

724

725 Dorsal posterior explants were dissected between stage 15-17 as previously  
726 described (Tucker and Slack, 2004). Explants were cultured in Danilchik's for  
727 Amy (DFA) buffer without antibiotics. Sibling tadpoles were reared in 1/9<sup>th</sup> MR as  
728 described above.

729

## 730 **Statistical Analysis**

731

732 R studio was utilized in generating statistics. One-way ANOVA, with Tukey's post  
733 hoc was utilized to calculate P-values for circularity and tail morphometric  
734 measurements, for qPCR, nucleoli number, and surface area and volume  
735 measurements P-values were calculated with a two-tailed student's t-test  
736 assuming unequal variance.

737 **Acknowledgements**

738

739 We thank Ed Parker for assisting with TEM imaging, and the UW vision core  
740 facility (NEI P30EY001730). We acknowledge support from the W. M. Keck  
741 Center for Advanced Studies in Neural Signaling (NIH S10 OD016240) and the  
742 assistance of center manager Dr. Nathaniel Peters. We are grateful to Nathaniel  
743 Ng of the Enrique Amaya lab for testing staging conditions for time-lapse analysis  
744 and preliminary movies. Alexander Chitsazan helped with training in R and  
745 advised on statistical methods. We thank the Molecular and Cell Biology of  
746 Xenopus Course at Cold Spring Harbor for embryology and microscopy training,  
747 the Xenopus Quantitative Imaging Course at the Marine Biological Laboratories  
748 for training in imaging and statistical analysis. We thank Xenbase for curation of  
749 genomic and literature information used to generate materials and conduct  
750 analysis. We thank Wills lab members, Emily Hatch of FHRC and John  
751 Wallingford of UT Austin for comments on the manuscript. Finally, we thank  
752 Daniel Levy University of Wyoming, Richard Harland UC Berkley, Cliff  
753 Brangwynne Princeton University, and John Wallingford UT Austin for materials.

754

755 **Competing Interests**

756

757 The authors have no competing interests to report.

758

759 **Funding**

760

761 This work was supported by the National Institutes of Health (R01NS099124 and  
762 R03HD091716 to AEW) and by unrestricted funds from the University of  
763 Washington.

764 **References**

- 765 **Baarlink, C., Plessner, M., Sherrard, A., Morita, K., Misu, S., Virant, D.,**  
766 **Kleinschnitz, E.-M., Harniman, R., Alibhai, D., Baumeister, S., et al.**  
767 (2017). A transient pool of nuclear F-actin at mitotic exit controls chromatin  
768 organization. *Nat. Cell Biol.* **19**, 1389–1399.
- 769 **Bauer, D. V, Huang, S. and Moody, S. A.** (1994). The cleavage stage origin of  
770 Spemann's Organizer: analysis of the movements of blastomere clones  
771 before and during gastrulation in *Xenopus*. *Development* **120**, 1179–89.
- 772 **Bhattacharya, D., Marfo, C. A., Li, D., Lane, M. and Khokha, M. K.** (2015).  
773 CRISPR/Cas9: An inexpensive, efficient loss of function tool to screen  
774 human disease genes in *Xenopus*. *Dev. Biol.* **408**, 196–204.
- 775 **Bonne, G., Schwartz, K., Barletta, M. R. Di, Varnous, S., Bécane, H.-M.,**  
776 **Hammouda, E.-H., Merlini, L., Muntoni, F., Greenberg, C. R., Gary, F., et**  
777 **al.** (1999). Mutations in the gene encoding lamin A/C cause autosomal  
778 dominant Emery-Dreifuss muscular dystrophy. *Nat. Genet.* **21**, 285–288.
- 779 **Brangwynne, C. P., Mitchison, T. J. and Hyman, A. A.** (2011). Active liquid-like  
780 behavior of nucleoli determines their size and shape in *Xenopus laevis*  
781 oocytes. *Proc. Natl. Acad. Sci.* **108**, 4334–4339.
- 782 **Buntrock, L., Marec, F., Krueger, S. and Traut, W.** (2012). Organ growth  
783 without cell division: somatic polyploidy in a moth, *Ephesia kuehniella*.  
784 *Genome* **55**, 755–763.
- 785 **Chang, W., Worman, H. J. and Gundersen, G. G.** (2015). Accessorizing and  
786 anchoring the LINC complex for multifunctionality. *J. Cell Biol.* **208**, 11–22.
- 787 **Chen, Z.-J., Wang, W.-P., Chen, Y.-C., Wang, J.-Y., Lin, W.-H., Tai, L.-A.,**  
788 **Liou, G.-G., Yang, C.-S. and Chi, Y.-H.** (2014). Dysregulated interactions  
789 between lamin A and SUN1 induce abnormalities in the nuclear envelope  
790 and endoplasmic reticulum in progeric laminopathies. *J. Cell Sci.* **127**, 1792–  
791 1804.
- 792 **Dahl, K. N., Scaffidi, P., Islam, M. F., Yodh, A. G., Wilson, K. L. and Misteli,**  
793 **T.** (2006). Distinct structural and mechanical properties of the nuclear lamina  
794 in Hutchinson-Gilford progeria syndrome. *Proc. Natl. Acad. Sci.* **103**, 10271–



795 10276.

796 **Davidson, P. M. and Lammerding, J.** (2014). Broken nuclei – lamins, nuclear  
797 mechanics, and disease. *Trends Cell Biol.* **24**, 247–256.

798 **Davis, R. L. and Kirschner, M. W.** (2000). The fate of cells in the tailbud of  
799 *Xenopus laevis*. *Development* **127**,.

800 **Denais, C. and Lammerding, J.** (2014). Nuclear Mechanics in Cancer. In  
801 *Advances in experimental medicine and biology*, pp. 435–470.

802 **Dreesen, O., Chojnowski, A., Ong, P. F., Zhao, T. Y., Common, J. E., Lunny,  
803 D., Lane, E. B., Lee, S. J., Vardy, L. A., Stewart, C. L., et al.** (2013). Lamin  
804 B1 fluctuations have differential effects on cellular proliferation and  
805 senescence. *J. Cell Biol.* **200**, 605–617.

806 **Dutta, A. and Kumar Sinha, D.** (2015). Turnover of the actomyosin complex in  
807 zebrafish embryos directs geometric remodelling and the recruitment of lipid  
808 droplets. *Sci. Rep.* **5**, 13915.

809 **Fraser, J., Ferrai, C., Chiariello, A. M., Schueler, M., Rito, T., Laudanno, G.,  
810 Barbieri, M., Moore, B. L., Kraemer, D. C. A., Aitken, S., et al.** (2015).  
811 Hierarchical folding and reorganization of chromosomes are linked to  
812 transcriptional changes in cellular differentiation. *Mol. Syst. Biol.* **11**, 852.

813 **Frost, B., Bardai, F. H. and Feany, M. B.** (2016). Lamin Dysfunction Mediates  
814 Neurodegeneration in Tauopathies. *Curr. Biol.* **26**, 129–136.

815 **Fu, Y., Chin, L. K., Bourouina, T., Liu, A. Q. and VanDongen, A. M. J.** (2012).  
816 Nuclear deformation during breast cancer cell transmigration. *Lab Chip* **12**,  
817 3774.

818 **Gdula, M. R., Poterlowicz, K., Mardaryev, A. N., Sharov, A. A., Peng, Y.,  
819 Fessing, M. Y. and Botchkarev, V. A.** (2013). Remodeling of Three-  
820 Dimensional Organization of the Nucleus during Terminal Keratinocyte  
821 Differentiation in the Epidermis. *J. Invest. Dermatol.* **133**, 2191–2201.

822 **Giarmarco, M. M., Cleghorn, W. M., Sloat, S. R., Hurley, J. B. and  
823 Brockerhoff, S. E.** (2017). Mitochondria Maintain Distinct Ca<sup>2+</sup> Pools in  
824 Cone Photoreceptors. *J. Neurosci.* **37**, 2061–2072.

825 **Goldman, R. D., Shumaker, D. K., Erdos, M. R., Eriksson, M., Goldman, A.**

- 826 **E., Gordon, L. B., Gruenbaum, Y., Khuon, S., Mendez, M., Varga, R. E.,**  
827 **et al.** (2004). Accumulation of mutant lamin A causes progressive changes  
828 in nuclear architecture in Hutchinson–Gilford progeria syndrome.
- 829 **Good, M. C., Vahey, M. D., Skandarajah, A., Fletcher, D. A. and Heald, R.**  
830 (2013). Cytoplasmic volume modulates spindle size during embryogenesis.  
831 *Science* **342**, 856–60.
- 832 **Guilak, F., Tedrow, J. R. and Burgkart, R.** (2000). Viscoelastic Properties of the  
833 Cell Nucleus. *Biochem. Biophys. Res. Commun.* **269**, 781–786.
- 834 **Hatch, E. M. and Hetzer, M. W.** (2016). Nuclear envelope rupture is induced by  
835 actin-based nucleus confinement. *J. Cell Biol.* **215**, 27–36.
- 836 **Hatch, E. M., Fischer, A. H., Deerinck, T. J. and Hetzer, M. W.** (2013).  
837 Catastrophic nuclear envelope collapse in cancer cell micronuclei. *Cell* **154**,  
838 47–60.
- 839 **Ho, C. Y., Jaalouk, D. E., Vartiainen, M. K. and Lammerding, J.** (2013). Lamin  
840 A/C and emerin regulate MKL1–SRF activity by modulating actin dynamics.  
841 *Nature* **497**, 507–511.
- 842 **Jevtić, P. and Levy, D. L.** (2015). Nuclear Size Scaling during *Xenopus* Early  
843 Development Contributes to Midblastula Transition Timing. *Curr. Biol.* **25**,  
844 45–52.
- 845 **Jevtić, P., Edens, L. J., Li, X., Nguyen, T., Chen, P. and Levy, D. L.** (2015).  
846 Concentration-dependent Effects of Nuclear Lamins on Nuclear Size in  
847 *Xenopus* and Mammalian Cells. *J. Biol. Chem.* **290**, 27557–27571.
- 848 **Kalendová, A., Kalasová, I., Yamazaki, S., Uličná, L., Harata, M. and Hozák,**  
849 **P.** (2014). Nuclear actin filaments recruit cofilin and actin-related protein 3,  
850 and their formation is connected with a mitotic block. *Histochem. Cell Biol.*  
851 **142**, 139–152.
- 852 **Keeling, M. C., Flores, L. R., Dodhy, A. H., Murray, E. R. and Gavara, N.**  
853 (2017). Actomyosin and vimentin cytoskeletal networks regulate nuclear  
854 shape, mechanics and chromatin organization. *Sci. Rep.* **7**, 5219.
- 855 **Kha, H. N., Chen, B. K., Clark, G. M. and Jones, R.** (2004). Stiffness properties  
856 for Nucleus standard straight and contour electrode arrays. *Med. Eng. Phys.*

- 857           **26**, 677–685.
- 858   **Khokha, M. K., Chung, C., Bustamante, E. L., Gaw, L. W. K., Trott, K. A.,**  
859           **Yeh, J., Lim, N., Lin, J. C. Y., Taverner, N., Amaya, E., et al.** (2002).  
860           Techniques and probes for the study of *Xenopus tropicalis* development.  
861           *Dev. Dyn.* **225**, 499–510.
- 862   **Kieserman, E. K., Lee, C., Gray, R. S., Park, T. J. and Wallingford, J. B.**  
863           (2010). High-magnification in vivo imaging of *Xenopus* embryos for cell and  
864           developmental biology. *Cold Spring Harb. Protoc.* **2010**, pdb.prot5427.
- 865   **Kim, D.-H. and Wirtz, D.** (2015). Cytoskeletal tension induces the polarized  
866           architecture of the nucleus. *Biomaterials* **48**, 161–172.
- 867   **King, M. C. and Lusk, C. P.** (2016). A model for coordinating nuclear mechanics  
868           and membrane remodeling to support nuclear integrity. *Curr. Opin. Cell Biol.*  
869           **41**, 9–17.
- 870   **Lammerding, J., Fong, L. G., Ji, J. Y., Reue, K., Stewart, C. L., Young, S. G.**  
871           **and Lee, R. T.** (2006). Lamins A and C but Not Lamin B1 Regulate Nuclear  
872           Mechanics. *J. Biol. Chem.* **281**, 25768–25780.
- 873   **Lee, J.-Y. and Harland, R. M.** (2007). Actomyosin contractility and microtubules  
874           drive apical constriction in *Xenopus* bottle cells. *Dev. Biol.* **311**, 40–52.
- 875   **Lemaitre, J. M., Géraud, G. and Méchali, M.** (1998). Dynamics of the genome  
876           during early *Xenopus laevis* development: karyomeres as independent units  
877           of replication. *J. Cell Biol.* **142**, 1159–66.
- 878   **Levy, D. L. and Heald, R.** (2010). Nuclear size is regulated by importin  $\alpha$  and  
879           Ntf2 in *Xenopus*. *Cell* **143**, 288–98.
- 880   **Li, Y., Hassinger, L., Thomson, T., Ding, B., Ashley, J., Hassinger, W. and**  
881           **Budnik, V.** (2016). Lamin Mutations Accelerate Aging via Defective Export  
882           of Mitochondrial mRNAs through Nuclear Envelope Budding. *Curr. Biol.* **26**,  
883           2052–2059.
- 884   **Mattout, A., Cagianca, D. S. and Gasser, S. M.** (2015a). Chromatin states and  
885           nuclear organization in development — a view from the nuclear lamina.  
886           *Genome Biol.* **16**, 174.
- 887   **Mattout, A., Aaronson, Y., Sailaja, B. S., Raghu Ram, E. V., Harikumar, A.,**

- 888 **Mallm, J.-P., Sim, K. H., Nissim-Rafinia, M., Supper, E., Singh, P. B., et**  
889 **al.** (2015b). Heterochromatin Protein 1 $\beta$  (HP1 $\beta$ ) has distinct functions and  
890 distinct nuclear distribution in pluripotent versus differentiated cells. *Genome*  
891 *Biol.* **16**, 213.
- 892 **McKenna, T., Rosengardten, Y., Viceconte, N., Baek, J.-H., Grochová, D.**  
893 **and Eriksson, M.** (2014). Embryonic expression of the common progeroid  
894 lamin A splice mutation arrests postnatal skin development. *Aging Cell* **13**,  
895 292–302.
- 896 **Moody, S. A.** (1987). Fates of the blastomeres of the 16-cell stage *Xenopus*  
897 embryo. *Dev. Biol.* **119**, 560–78.
- 898 **Nakayama, T., Fish, M. B., Fisher, M., Oomen-Hajagos, J., Thomsen, G. H.**  
899 **and Grainger, R. M.** (2013). Simple and efficient CRISPR/Cas9-mediated  
900 targeted mutagenesis in *Xenopus tropicalis*. *Genesis* **51**, 835–43.
- 901 **Nieuwkoop, P. D. (Pieter D. . and Faber, J.** (1994). *Normal table of Xenopus*  
902 *laevis (Daudin) : a systematical and chronological survey of the development*  
903 *from the fertilized egg till the end of metamorphosis*. New York : Garland  
904 Pub.
- 905 **Oda, H., Shirai, N., Ura, N., Ohsumi, K. and Iwabuchi, M.** (2017). Chromatin  
906 tethering to the nuclear envelope by nuclear actin filaments: a novel role of  
907 the actin cytoskeleton in the *Xenopus* blastula. *Genes to Cells* **22**, 376–391.
- 908 **Pajerowski, J. D., Dahl, K. N., Zhong, F. L., Sammak, P. J. and Discher, D. E.**  
909 (2007). Physical plasticity of the nucleus in stem cell differentiation. *Proc.*  
910 *Natl. Acad. Sci.* **104**, 15619–15624.
- 911 **Peric-Hupkes, D., Meuleman, W., Pagie, L., Bruggeman, S. W. M., Solovei, I.,**  
912 **Brugman, W., Gräf, S., Flicek, P., Kerkhoven, R. M., van Lohuizen, M., et**  
913 **al.** (2010). Molecular maps of the reorganization of genome-nuclear lamina  
914 interactions during differentiation. *Mol. Cell* **38**, 603–13.
- 915 **Perovanovic, J., Dell’Orso, S., Gnoch, V. F., Jaiswal, J. K., Sartorelli, V.,**  
916 **Vigouroux, C., Mamchaoui, K., Mouly, V., Bonne, G. and Hoffman, E. P.**  
917 (2016). Laminopathies disrupt epigenomic developmental programs and cell  
918 fate. *Sci. Transl. Med.* **8**, 335ra58.

- 919 **Pillay, J., Tak, T., Kamp, V. M. and Koenderman, L.** (2013). Immune  
920 suppression by neutrophils and granulocytic myeloid-derived suppressor  
921 cells: similarities and differences. *Cell. Mol. Life Sci.* **70**, 3813–3827.
- 922 **Plessner, M., Melak, M., Chinchilla, P., Baarlink, C. and Grosse, R.** (2015).  
923 Nuclear F-actin formation and reorganization upon cell spreading. *J. Biol.*  
924 *Chem.* **290**, 11209–16.
- 925 **Ramdas, N. M. and Shivashankar, G. V.** (2015). Cytoskeletal Control of  
926 Nuclear Morphology and Chromatin Organization. *J. Mol. Biol.* **427**, 695–  
927 706.
- 928 **Rowat, A. C., Jaalouk, D. E., Zwerger, M., Ung, W. L., Eydelnant, I. A., Olins,**  
929 **D. E., Olins, A. L., Herrmann, H., Weitz, D. A. and Lammerding, J.**  
930 (2013). Nuclear Envelope Composition Determines the Ability of Neutrophil-  
931 type Cells to Passage through Micron-scale Constrictions. *J. Biol. Chem.*  
932 **288**, 8610–8618.
- 933 **Schirmer, E. C., Guan, T. and Gerace, L.** (2001). Involvement of the lamin rod  
934 domain in heterotypic lamin interactions important for nuclear organization.  
935 *J. Cell Biol.* **153**, 479–89.
- 936 **Schöchlin, M., Weissinger, S. E., Brandes, A. R., Herrmann, M., Möller, P.**  
937 **and Lennerz, J. K.** (2014). A nuclear circularity-based classifier for  
938 diagnostic distinction of desmoplastic from spindle cell melanoma in digitized  
939 histological images. *J. Pathol. Inform.* **5**, 40.
- 940 **Schoft, V. K., Beauvais, A. J., Lang, C., Gajewski, A., Prüfert, K., Winkler, C.,**  
941 **Akimenko, M.-A., Paulin-Levasseur, M. and Krohne, G.** (2003). The  
942 lamina-associated polypeptide 2 (LAP2) isoforms beta, gamma and omega  
943 of zebrafish: developmental expression and behavior during the cell cycle. *J.*  
944 *Cell Sci.* **116**, 2505–17.
- 945 **Sedzinski, J., Hannezo, E., Tu, F., Biro, M. and Wallingford, J. B.** (2016).  
946 Emergence of an Apical Epithelial Cell Surface In Vivo. *Dev. Cell* **36**, 24–35.
- 947 **Session, A. M., Uno, Y., Kwon, T., Chapman, J. A., Toyoda, A., Takahashi,**  
948 **S., Fukui, A., Hikosaka, A., Suzuki, A., Kondo, M., et al.** (2016). Genome  
949 evolution in the allotetraploid frog *Xenopus laevis*. *Nature* **538**, 336–343.

- 950 **Shah, P. P., Donahue, G., Otte, G. L., Capell, B. C., Nelson, D. M., Cao, K.,**  
951 **Aggarwala, V., Cruickshanks, H. A., Rai, T. S., McBryan, T., et al.** (2013).  
952 Lamin B1 depletion in senescent cells triggers large-scale changes in gene  
953 expression and the chromatin landscape. *Genes Dev.* **27**, 1787–1799.
- 954 **Sive, H. L., Grainger, R. and Harland, R. M.** (2010). *Early development of*  
955 *Xenopus laevis : a laboratory manual*. Cold Spring Harbor Laboratory Press.
- 956 **Solovei, I., Wang, A. S., Thanisch, K., Schmidt, C. S., Krebs, S., Zwerger, M.,**  
957 **Cohen, T. V, Devys, D., Foisner, R., Peichl, L., et al.** (2013). LBR and  
958 lamin A/C sequentially tether peripheral heterochromatin and inversely  
959 regulate differentiation. *Cell* **152**, 584–98.
- 960 **Swift, J., Ivanovska, I. L., Buxboim, A., Harada, T., Dingal, P. C. D. P., Pinter,**  
961 **J., Pajeroski, J. D., Spinler, K. R., Shin, J.-W., Tewari, M., et al.** (2013).  
962 Nuclear Lamin-A Scales with Tissue Stiffness and Enhances Matrix-Directed  
963 Differentiation. *Science (80-. ).* **341**, 1240104–1240104.
- 964 **Tariq, Z., Zhang, H., Chia-Liu, A., Shen, Y., Gete, Y., Xiong, Z.-M., Tocheny,**  
965 **C., Campanello, L., Wu, D., Losert, W., et al.** (2017). Lamin A and  
966 microtubules collaborate to maintain nuclear morphology. *Nucleus* **8**, 433–  
967 446.
- 968 **Towbin, B. D., González-Aguilera, C., Sack, R., Gaidatzis, D., Kalck, V.,**  
969 **Meister, P., Askjaer, P. and Gasser, S. M.** (2012). Step-Wise Methylation  
970 of Histone H3K9 Positions Heterochromatin at the Nuclear Periphery. *Cell*  
971 **150**, 934–947.
- 972 **Tucker, A. S. and Slack, J. M. W.** (2004). Independent induction and formation  
973 of the dorsal and ventral fins in *Xenopus laevis*. *Dev. Dyn.* **230**, 461–467.
- 974 **Vergnes, L., Peterfy, M., Bergo, M. O., Young, S. G. and Reue, K.** (2004).  
975 Lamin B1 is required for mouse development and nuclear integrity. *Proc.*  
976 *Natl. Acad. Sci.* **101**, 10428–10433.
- 977 **Versaevel, M., Grevesse, T. and Gabriele, S.** (2012). Spatial coordination  
978 between cell and nuclear shape within micropatterned endothelial cells. *Nat.*  
979 *Commun.* **3**, 671.
- 980 **Verstraeten, V. L. R. M., Ji, J. Y., Cummings, K. S., Lee, R. T. and**



- 981 **Lammerding, J.** (2008). Increased mechanosensitivity and nuclear stiffness  
982 in Hutchinson–Gilford progeria cells: effects of farnesyltransferase inhibitors.  
983 *Aging Cell* **7**, 383–393.
- 984 **Vishavkarma, R., Raghavan, S., Kuyyamudi, C., Majumder, A., Dhawan, J.**  
985 **and Pullarkat, P. A.** (2014). Role of actin filaments in correlating nuclear  
986 shape and cell spreading. *PLoS One* **9**, e107895.
- 987 **Wallingford, J. B.** (2010). Low-Magnification Live Imaging of Xenopus Embryos  
988 for Cell and Developmental Biology. *Cold Spring Harb. Protoc.* **2010**,  
989 pdb.prot5425-prot5425.
- 990 **Wang, Y., Panteleyev, A. A., Owens, D. M., Djabali, K., Stewart, C. L. and**  
991 **Worman, H. J.** (2008). Epidermal expression of the truncated prelamin A  
992 causing Hutchinson-Gilford progeria syndrome: effects on keratinocytes, hair  
993 and skin. *Hum. Mol. Genet.* **17**, 2357–2369.
- 994 **Webster, M., Witkin, K. L. and Cohen-Fix, O.** (2009). Sizing up the nucleus:  
995 nuclear shape, size and nuclear-envelope assembly. *J. Cell Sci.* **122**, 1477–  
996 1486.
- 997 **Wiggan, O., Schroder, B., Krapf, D., Bamburg, J. R. and DeLuca, J. G.**  
998 (2017). Cofilin Regulates Nuclear Architecture through a Myosin-II  
999 Dependent Mechanotransduction Module. *Sci. Rep.* **7**, 40953.
- 1000 **Wühr, M., Güttler, T., Peshkin, L., McAlister, G. C., Sonnett, M., Ishihara, K.,**  
1001 **Groen, A. C., Presler, M., Erickson, B. K., Mitchison, T. J., et al.** (2015).  
1002 The Nuclear Proteome of a Vertebrate. *Curr. Biol.* **25**, 2663–2671.
- 1003 **Yang, S. H., Chang, S. Y., Yin, L., Tu, Y., Hu, Y., Yoshinaga, Y., de Jong, P.**  
1004 **J., Fong, L. G. and Young, S. G.** (2011). An absence of both lamin B1 and  
1005 lamin B2 in keratinocytes has no effect on cell proliferation or the  
1006 development of skin and hair. *Hum. Mol. Genet.* **20**, 3537–3544.
- 1007 **Zwenger, M., Jaalouk, D. E., Lombardi, M. L., Isermann, P., Mauermann, M.,**  
1008 **Dialynas, G., Herrmann, H., Wallrath, L. L. and Lammerding, J.** (2013).  
1009 Myopathic lamin mutations impair nuclear stability in cells and tissue and  
1010 disrupt nucleo-cytoskeletal coupling. *Hum. Mol. Genet.* **22**, 2335–49.  
1011



1012 **Figure Legends**

1013

1014 **Figure 1. Nuclei in the tail fin of *Xenopus tropicalis* are branched.** A) Bright  
1015 field image of a stage 41 tadpole tail. Immunofluorescence of DAPI (cyan) in a  
1016 single nucleus. The scale bar represents 5  $\mu\text{m}$ . B) Two models of nuclear  
1017 structure, branched chromatin in an ellipsoid nuclear compartment or branched  
1018 chromatin in a branched nuclear compartment. C) Experimental design to  
1019 address B). D) Fluorescent images of the nuclear lumen, periphery, and  
1020 chromatin. Scale bar represents 10  $\mu\text{m}$ . E) Immunofluorescence of nuclear  
1021 branches during development. Scale bar represents 10  $\mu\text{m}$ .

1022

1023 **Figure 2. Epidermal cells with branched nuclei appear healthy and contain**  
1024 **active enhancers.** A) Transmission electron micrographs of cells with branched  
1025 nuclei. Upper left panel shows a single nucleus, Scale bar represents 1  $\mu\text{m}$ .  
1026 Magenta box indicates region depicted in second panel. Arrow head shows  
1027 nuclear pore. Scale bar represents 250nm. Third panel shows a single nucleus,  
1028 scale bar represents 1  $\mu\text{m}$ . Magenta box indicates region depicted in fourth  
1029 panel. Fourth panel shows mitochondria of a cell with a branched nucleus, with  
1030 visible cristae. Scale bar represents 1  $\mu\text{m}$ . B) Quantification of nuclear envelope  
1031 (NE) width and nuclear pore (NP) width from TEM micrographs. C) Violin plots of  
1032 the distribution of nucleoli in round (n=38 nuclei, 3 tadpoles) and branched nuclei  
1033 in the tadpole (n=46 nuclei, 3 tadpoles) (p=0.49, two-tailed student's t-test). D)  
1034 Fluorescent images of H2B and nucleoli labeled by fibrillarin, scale bar  
1035 represents 10  $\mu\text{m}$ . E) Distribution of chromatin marks in branched nuclei.  
1036 Immunofluorescence of H3K27ac (active transcription), H3K4me3 (active  
1037 enhancers) H3K9me3 (heterochromatin). Scale bars represent 10  $\mu\text{m}$ . F) Live  
1038 image of HP1 $\beta$  (heterochromatin), white arrow heads indicate foci. Scale bars  
1039 represent 10  $\mu\text{m}$ .

1040

1041 **Figure 3. Cells with branched nuclei have active cell cycles.** A)  
1042 Immunofluorescence of phospho-H3 (PH3) and Lamin B1 cells in various stages

1043 of mitosis. B) Various stages of mitosis in live cells. Asterisk shows potential  
1044 vesicles being from the cell. Scale bars represent 10  $\mu\text{m}$ .  
1045  
1046 **Figure 4. Perturbations of Actin but not microtubules disrupt nuclear**  
1047 **branching.** A) Actin localization in cells with branched nuclei, H2B (magenta)  
1048 and LifeAct (green) Scale bar = 10  $\mu\text{m}$ . B) Latrunculin B treatment causes loss of  
1049 actin filaments (utrophin-GFP, green), and nuclear branches (H2B, magenta).  
1050 White arrow heads show depolymerized actin, asterisk denotes a single nucleus.  
1051 Times denote length of treatment. Scale bar = 10  $\mu\text{m}$ . C) Nuclear branches (H2B,  
1052 magenta) and actin filaments (LifeAct, green) reform after Lat B wash-out. White  
1053 arrow heads show changes in actin. Asterisk and carrot show single nuclei. Scale  
1054 bar = 10  $\mu\text{m}$ . D) Nuclear depth ( $\mu\text{m}$ ) of Wildtype (n=14 nuclei, 3 tadpoles) and  
1055 Lat B treated tadpoles (n=17 nuclei, 4 tadpoles) (E) Nuclear surface area /  
1056 volume ratios in Wildtype (n=21 nuclei, 3 tadpoles) and Lat B treated tadpoles  
1057 (n=19 nuclei, 3 tadpoles) ( $p < 0.05$ , one-tailed student's t-test) F) Treatment with  
1058 Cytochalasin D (Cyto D) and latrunculin B (Lat B) disrupt nuclear branches,  
1059 branches remain intact in DMSO vehicle control. Scale bars =10  $\mu\text{m}$ . G)  
1060 Nocodazole treatment disrupts microtubules, but not nuclear branches. Scale  
1061 bars =10  $\mu\text{m}$ . H) Quantification of nuclear circularity in actin and microtubule drug  
1062 treatment, Cyto D (n=50; 7 tadpoles) and Lat B (n=45; 6 tadpoles) significantly  
1063 increase circularity compared to DMSO (n=168; 10 tadpoles), Nocodazole (n=90;  
1064 3 tadpoles) had no change compared to DMSO ( $p < 0.01$ , one-way ANOVA and  
1065 Tukey's post-hoc, error bars are s.e.m.) C) Mosaic CRISPR/Cas9 knock-out of  
1066 lamin B1, and dominant negative lamin B1 disrupt nuclear branches. Scale bars  
1067 represent 10  $\mu\text{m}$ . D) Quantification of nuclear circularity in lamin B1 perturbed  
1068 nuclei. Whole animal (n=86 nuclei; 7 tadpoles) and epidermal only knockouts  
1069 (n=51 nuclei; 6 tadpoles), and laminB1 dominant negative (n=50; 5 tadpoles)  
1070 increase circularity significantly relative to wildtype (n=82 nuclei; 7 tadpoles)  
1071 ( $p < 0.01$ , ANOVA and Tukey's post hoc, error bars are s.e.m.). Scrambled  
1072 CRISPR/Cas9 guide (n=40; 5 tadpoles) does not change nuclear circularity  
1073 relative to wildtype.

1074

1075 **Figure 5. LaminB1 is necessary for nuclear branches.** A) Mosaic Crispr Cas9  
1076 knock-out of lamin B1, and dominant negative lamin B1 disrupt nuclear  
1077 branches. Scale bars represent 10  $\mu$ m. B) Quantification of nuclear circularity in  
1078 lamin B1 perturbed nuclei. Whole animal (n=86 nuclei; 7 tadpoles) and epidermal  
1079 only knockouts (n=51 nuclei; 6 tadpoles), and laminB1 dominant negative (n=50  
1080 nuclei; 5 tadpoles) increase circularity significantly relative to wildtype (n=82  
1081 nuclei; 7 tadpoles) ( $p < 0.01$ , ANOVA and Tukey's post hoc, error bars are s.e.m.).  
1082 Scrambled CRISPR/Cas9 guide (n=40 nuclei; 5 tadpoles) does not change  
1083 nuclear circularity relative to wildtype.

1084

1085 **Figure 6. Nuclear morphology in arises independently from swimming**  
1086 **motions and contributes to fin morphology.** A) Dorsal posterior explants  
1087 develop a stationary tail (scale bar indicates 1 mm) which retains nuclear  
1088 branching (Scale bars represent 10  $\mu$ m). Circularity is unchanged between  
1089 explants (n= 86 nuclei; 5 explants) and stage matched tadpoles (n= 32 nuclei; 4  
1090 tadpoles) ( $p > 0.05$ , ANOVA and Tukey's post-hoc, error bars are s.e.m.). B)  
1091 Stage 41 tadpoles with and without *Lmnb1*. Boxed area of E-*Lmnb1* tadpole  
1092 shown. Scale bars indicate 1mm. C) Tadpole phenotypes G1 = Whole embryo  
1093 *lmb1* CRISPR with guide 1, G2 = Whole embryo *lmb1* CRISPR with guide 2,  
1094 8G1 = Epidermal *lmb1* CRISPR with guide 1 (G1 n= 409 tadpoles; 5 clutches,  
1095 G2 n=22 tadpoles; 1 clutch, 8G1 n= 155 tadpoles; 3 clutches, scrmb1 n= 149  
1096 tadpoles; 3 clutches, WT n= 201 tadpoles; 4 clutches). D) Tail width of tadpoles  
1097 are significantly decreased in *lmb1* perturbed tadpoles E) Tail length of tadpoles  
1098 are significantly decreased in *lmb1* perturbed tadpoles (For D-E; WT n=11,  
1099 *Lmn B1* KO n= 16, E *Lmn B1* KO n=6, *Scrmb1* n=12,  $p < 0.01$  one-way ANOVA  
1100 and Tukey's post hoc). F) Perturbations of actin filaments and LaminB1 alter  
1101 nuclear morphology.

Figure 1

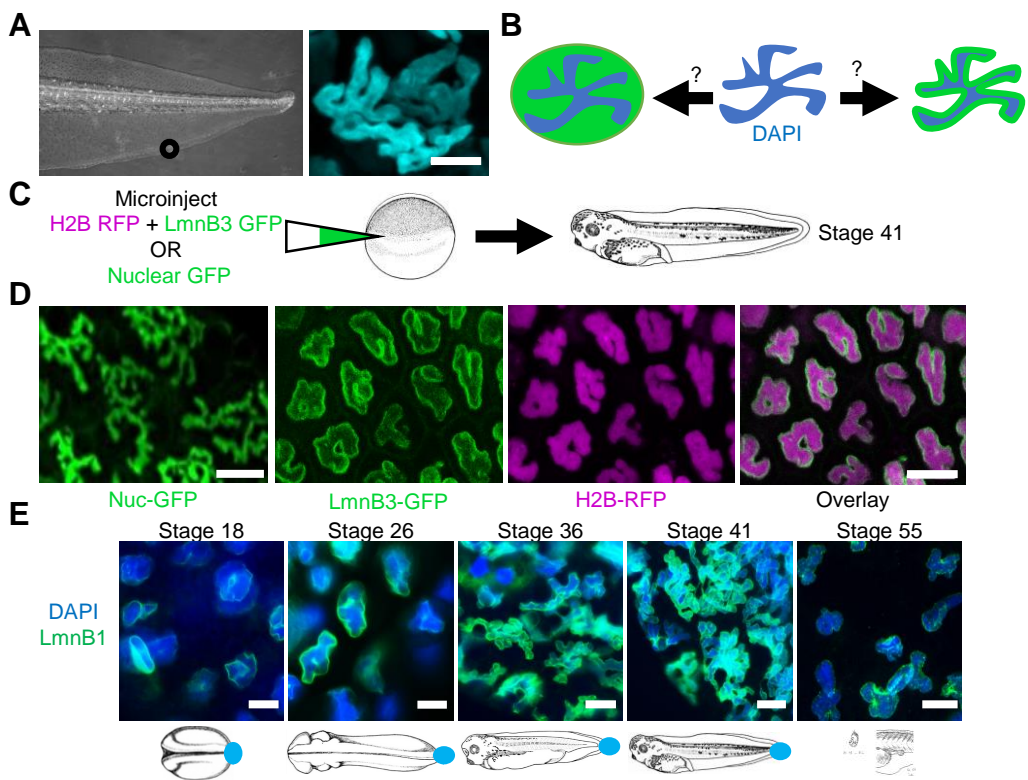

Figure 2

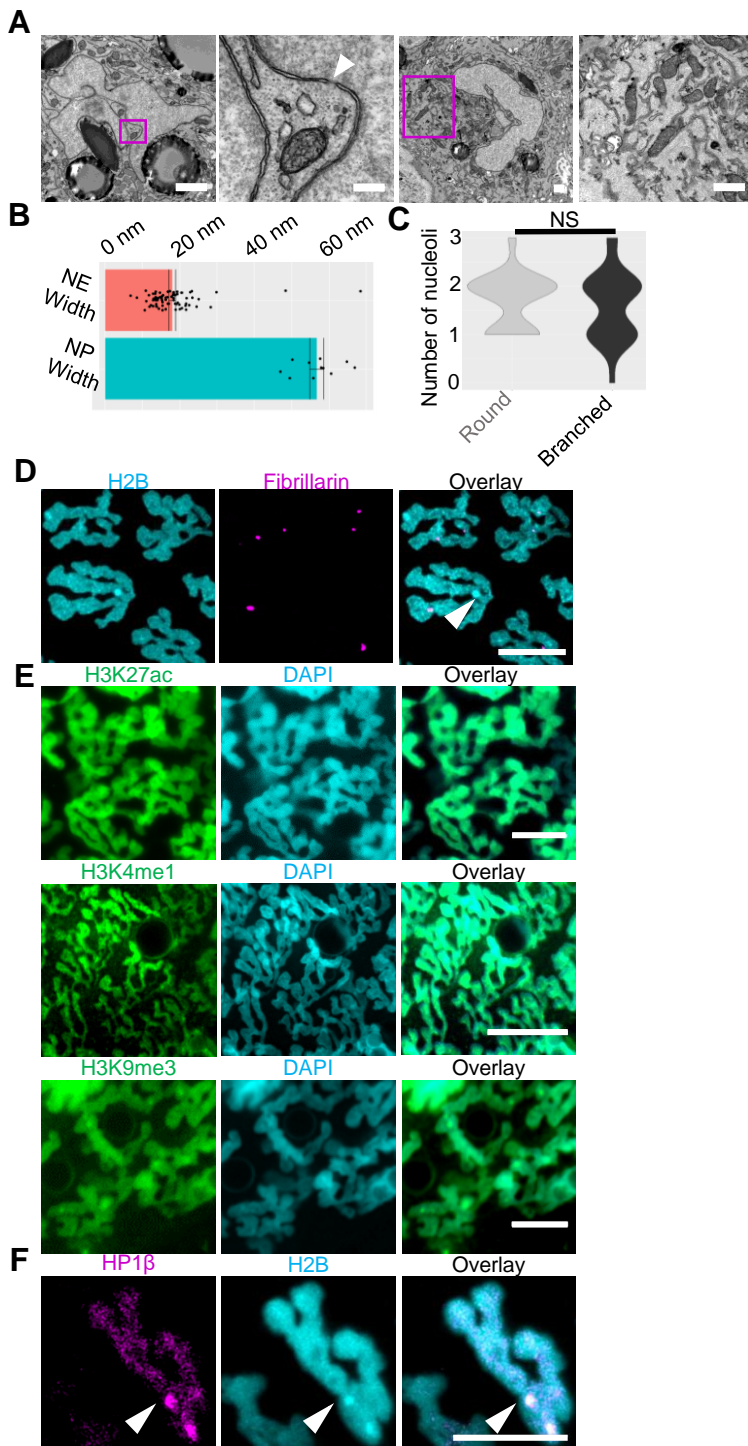



Figure 3

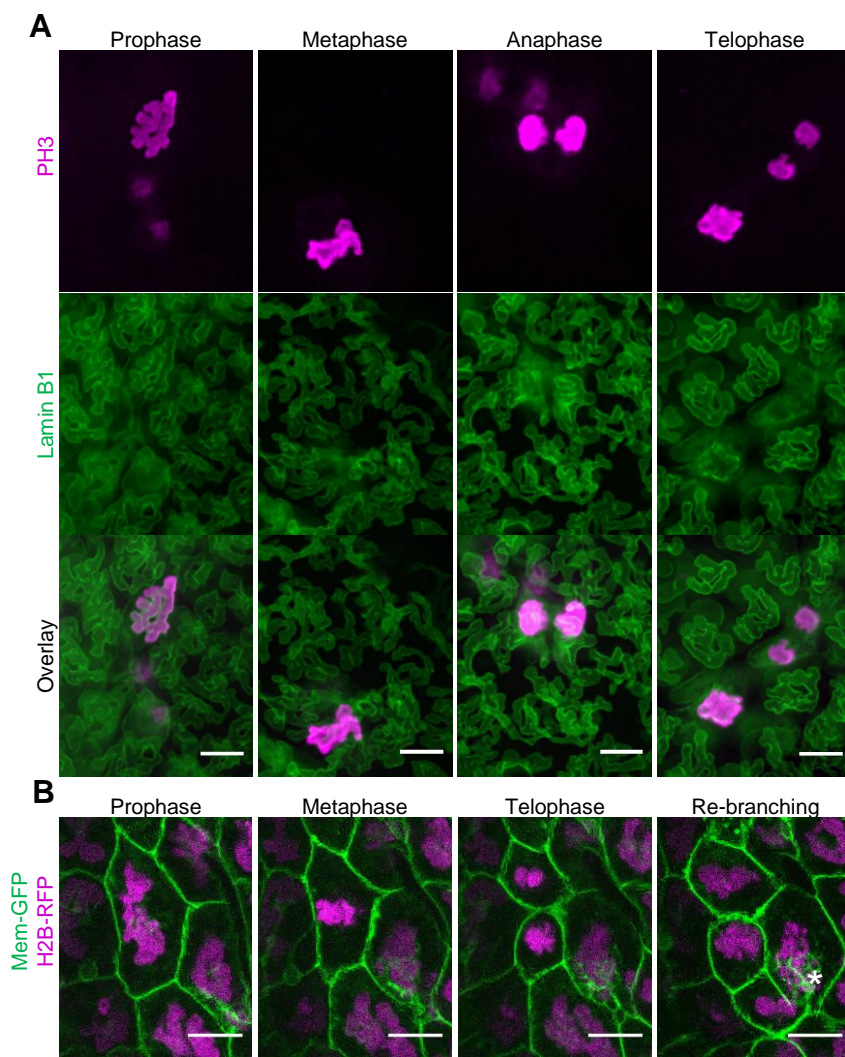

Figure 4

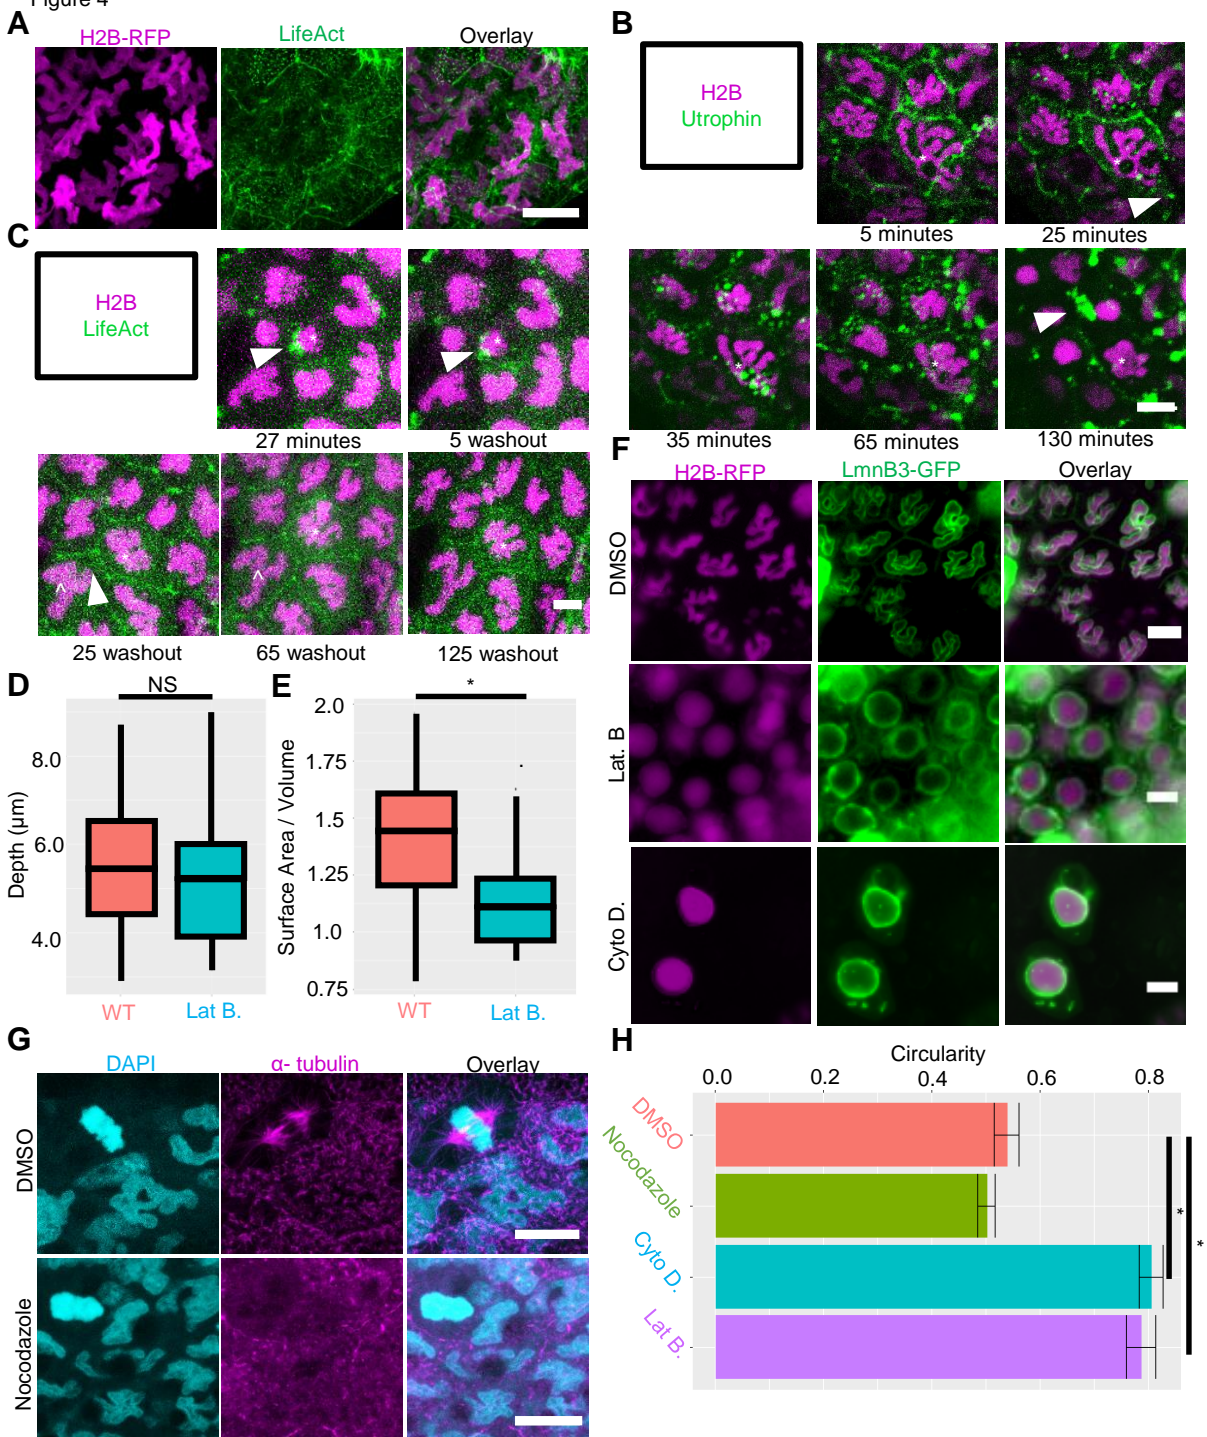

Figure 5

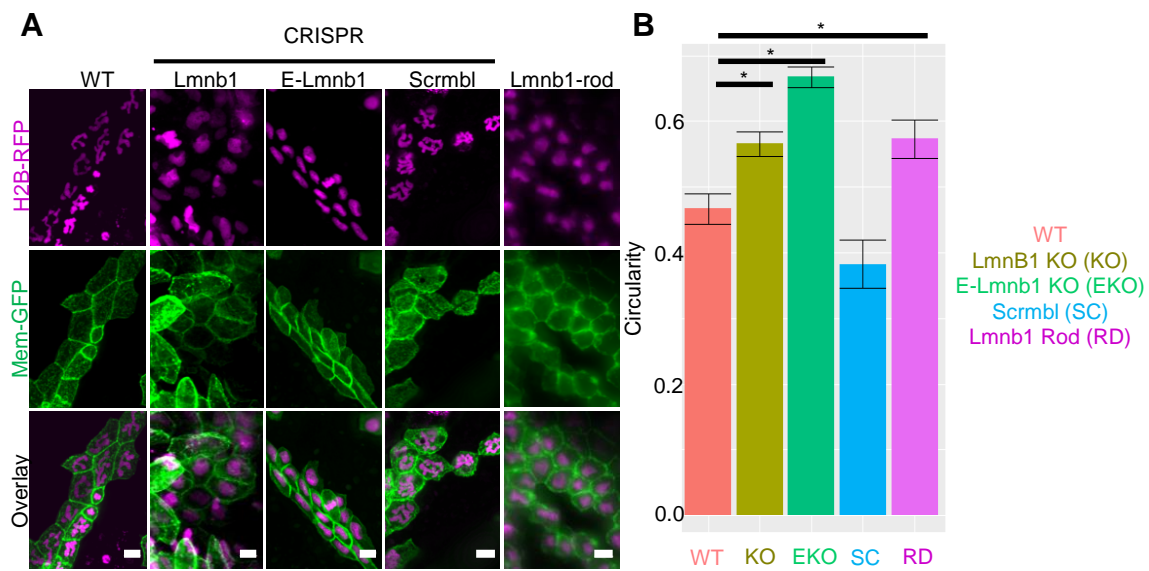



Figure 6

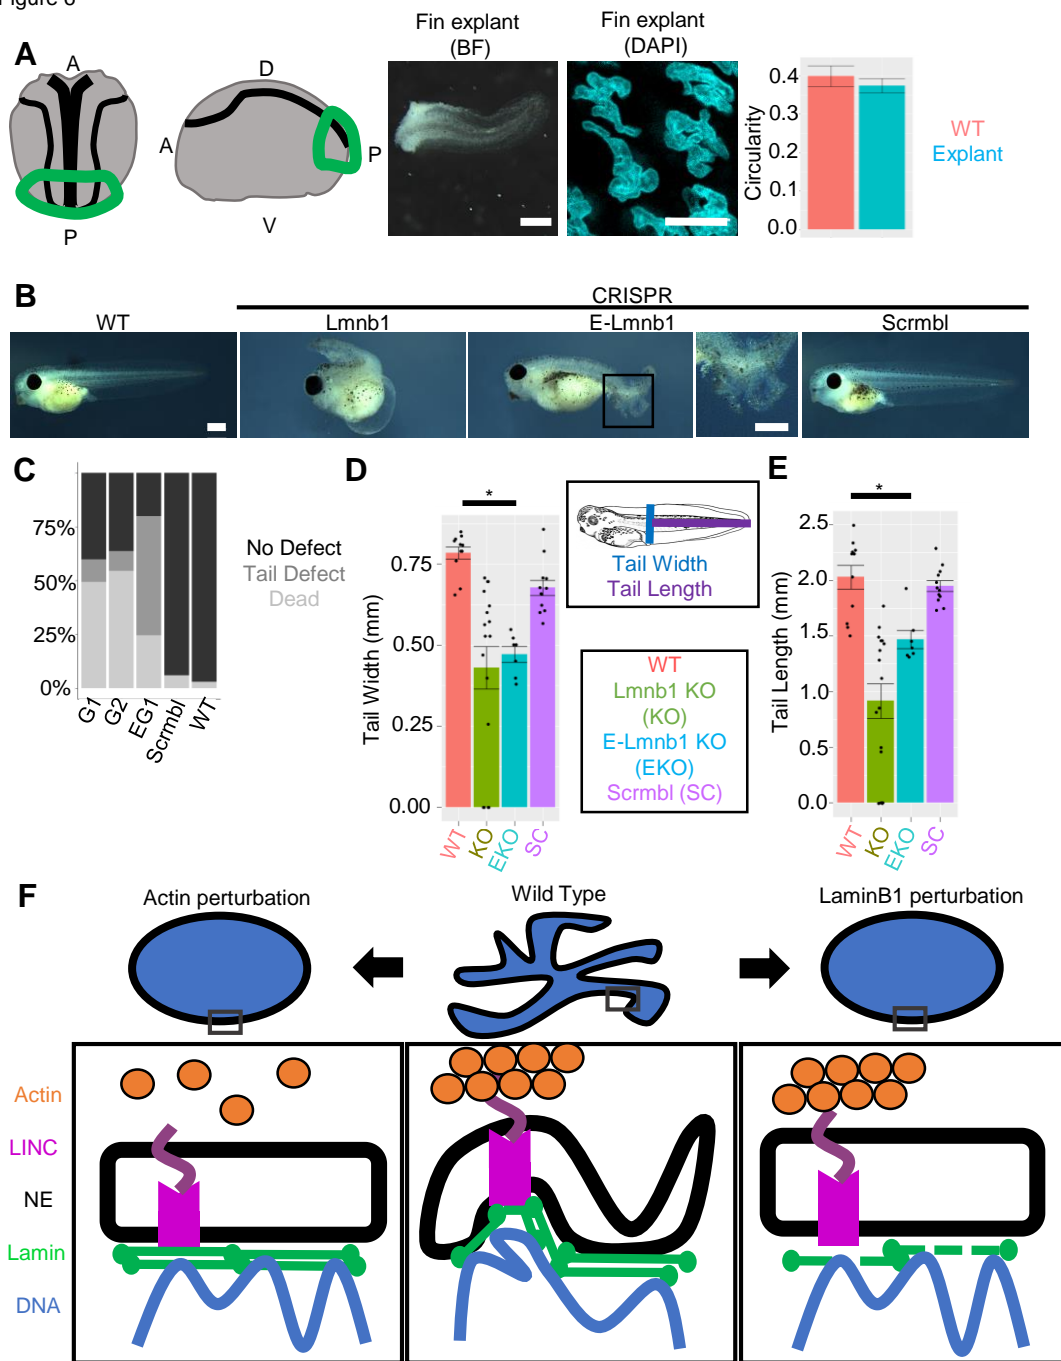

Source: https://www.biorxiv.org/content/10.1101/364471v1.full.pdf
